# Supplementary figures and images for: Comparative Analysis Revealed Intrageneric and Intraspecific Genomic Variation in Chloroplast Genomes of Actinidia spp. (Actinidiaceae, Viridiplantae)
Source: MDPI journal article supplement (doi:10.3390/horticulturae9111175), 2023-10-27

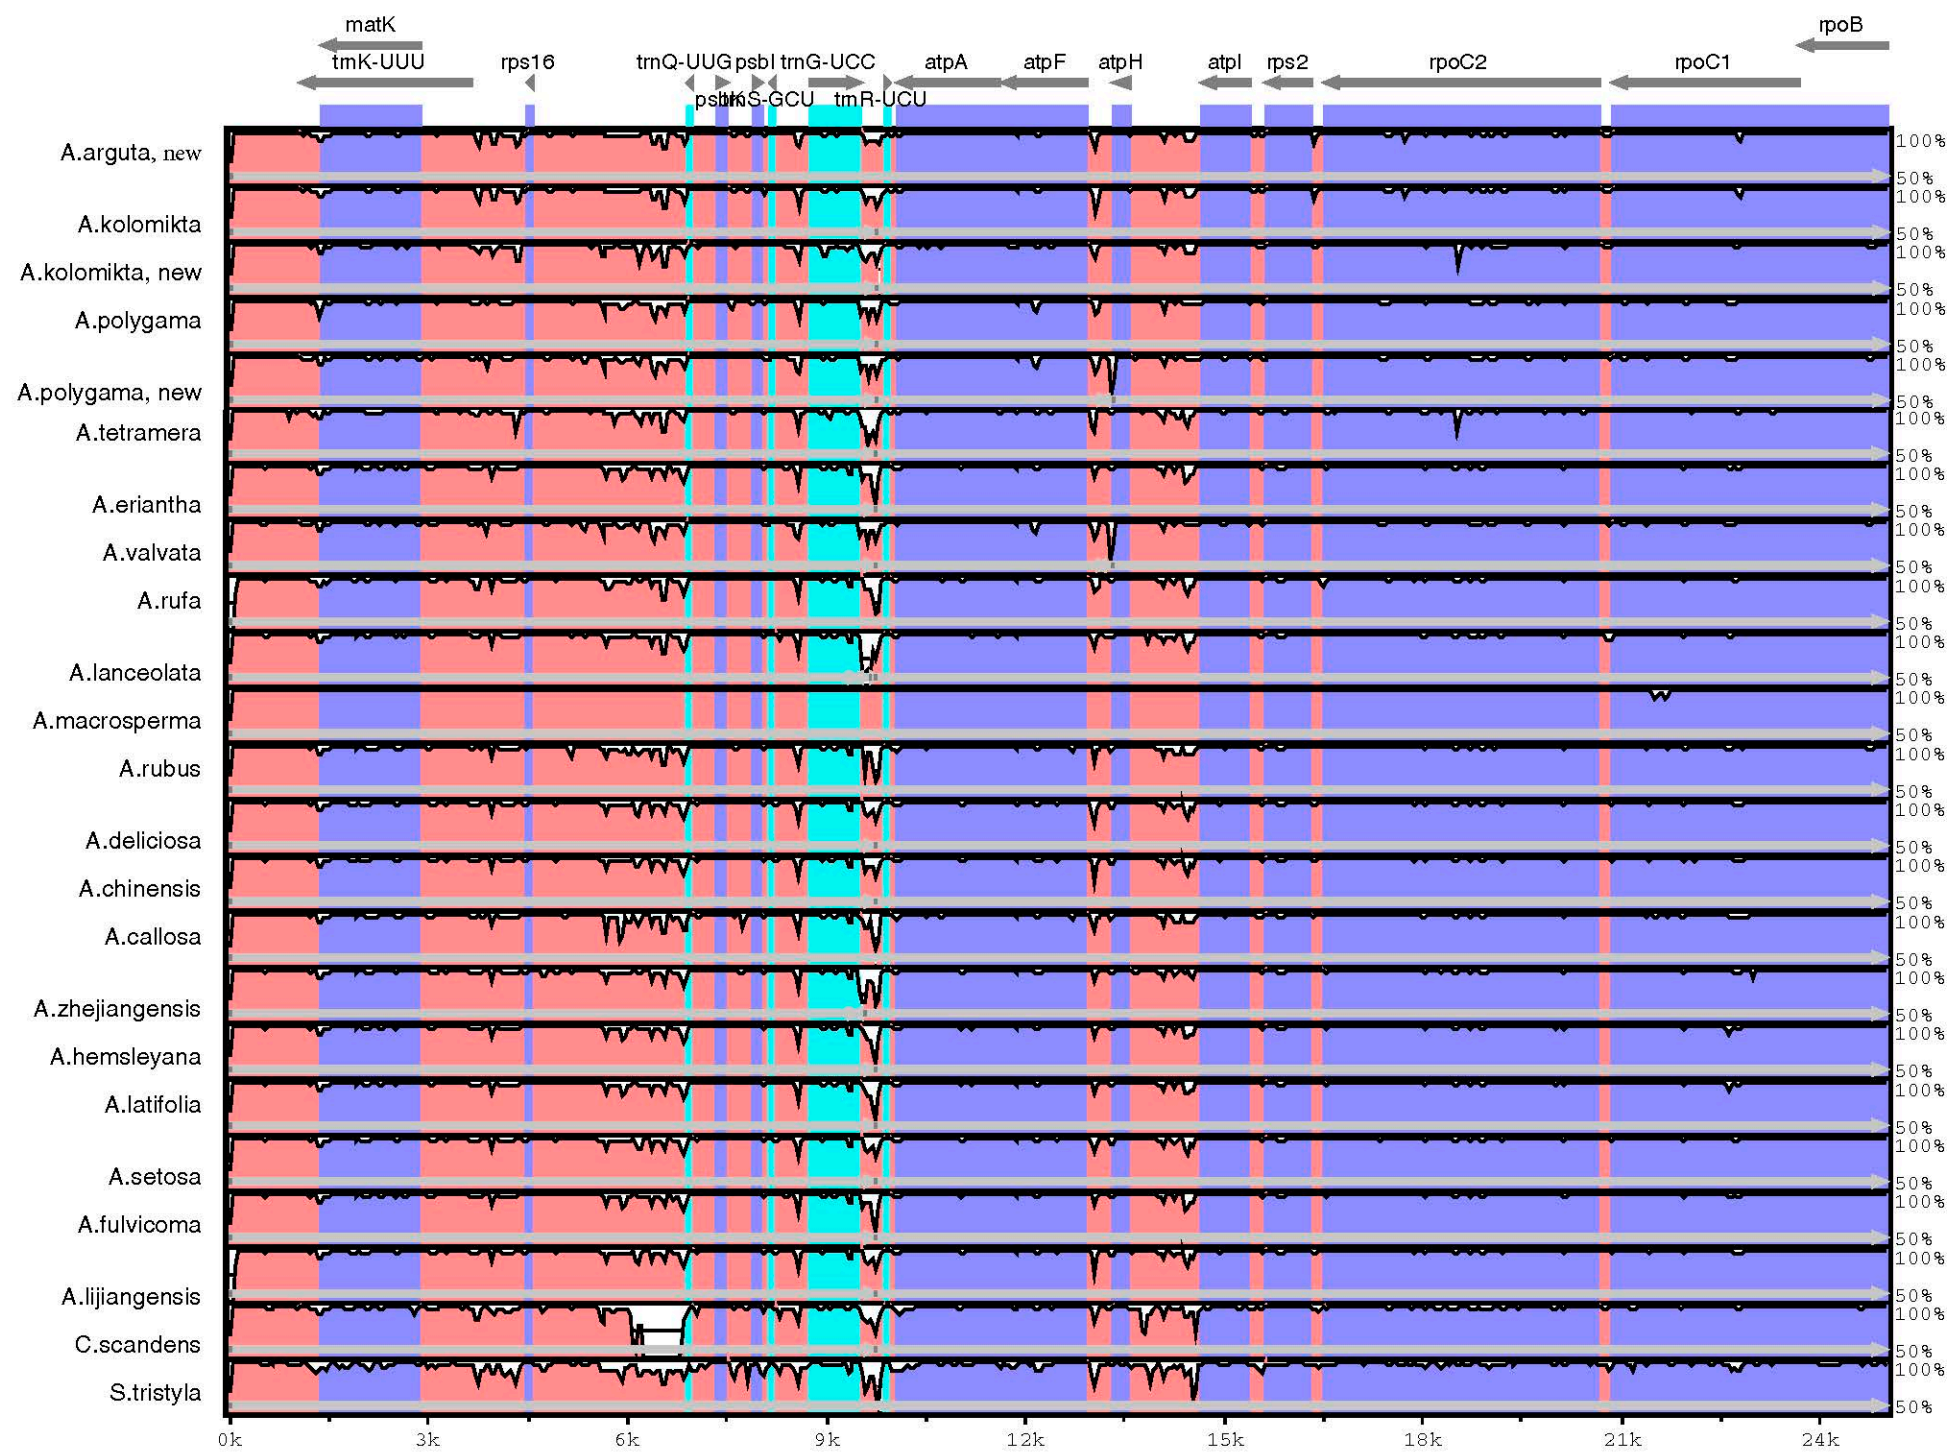

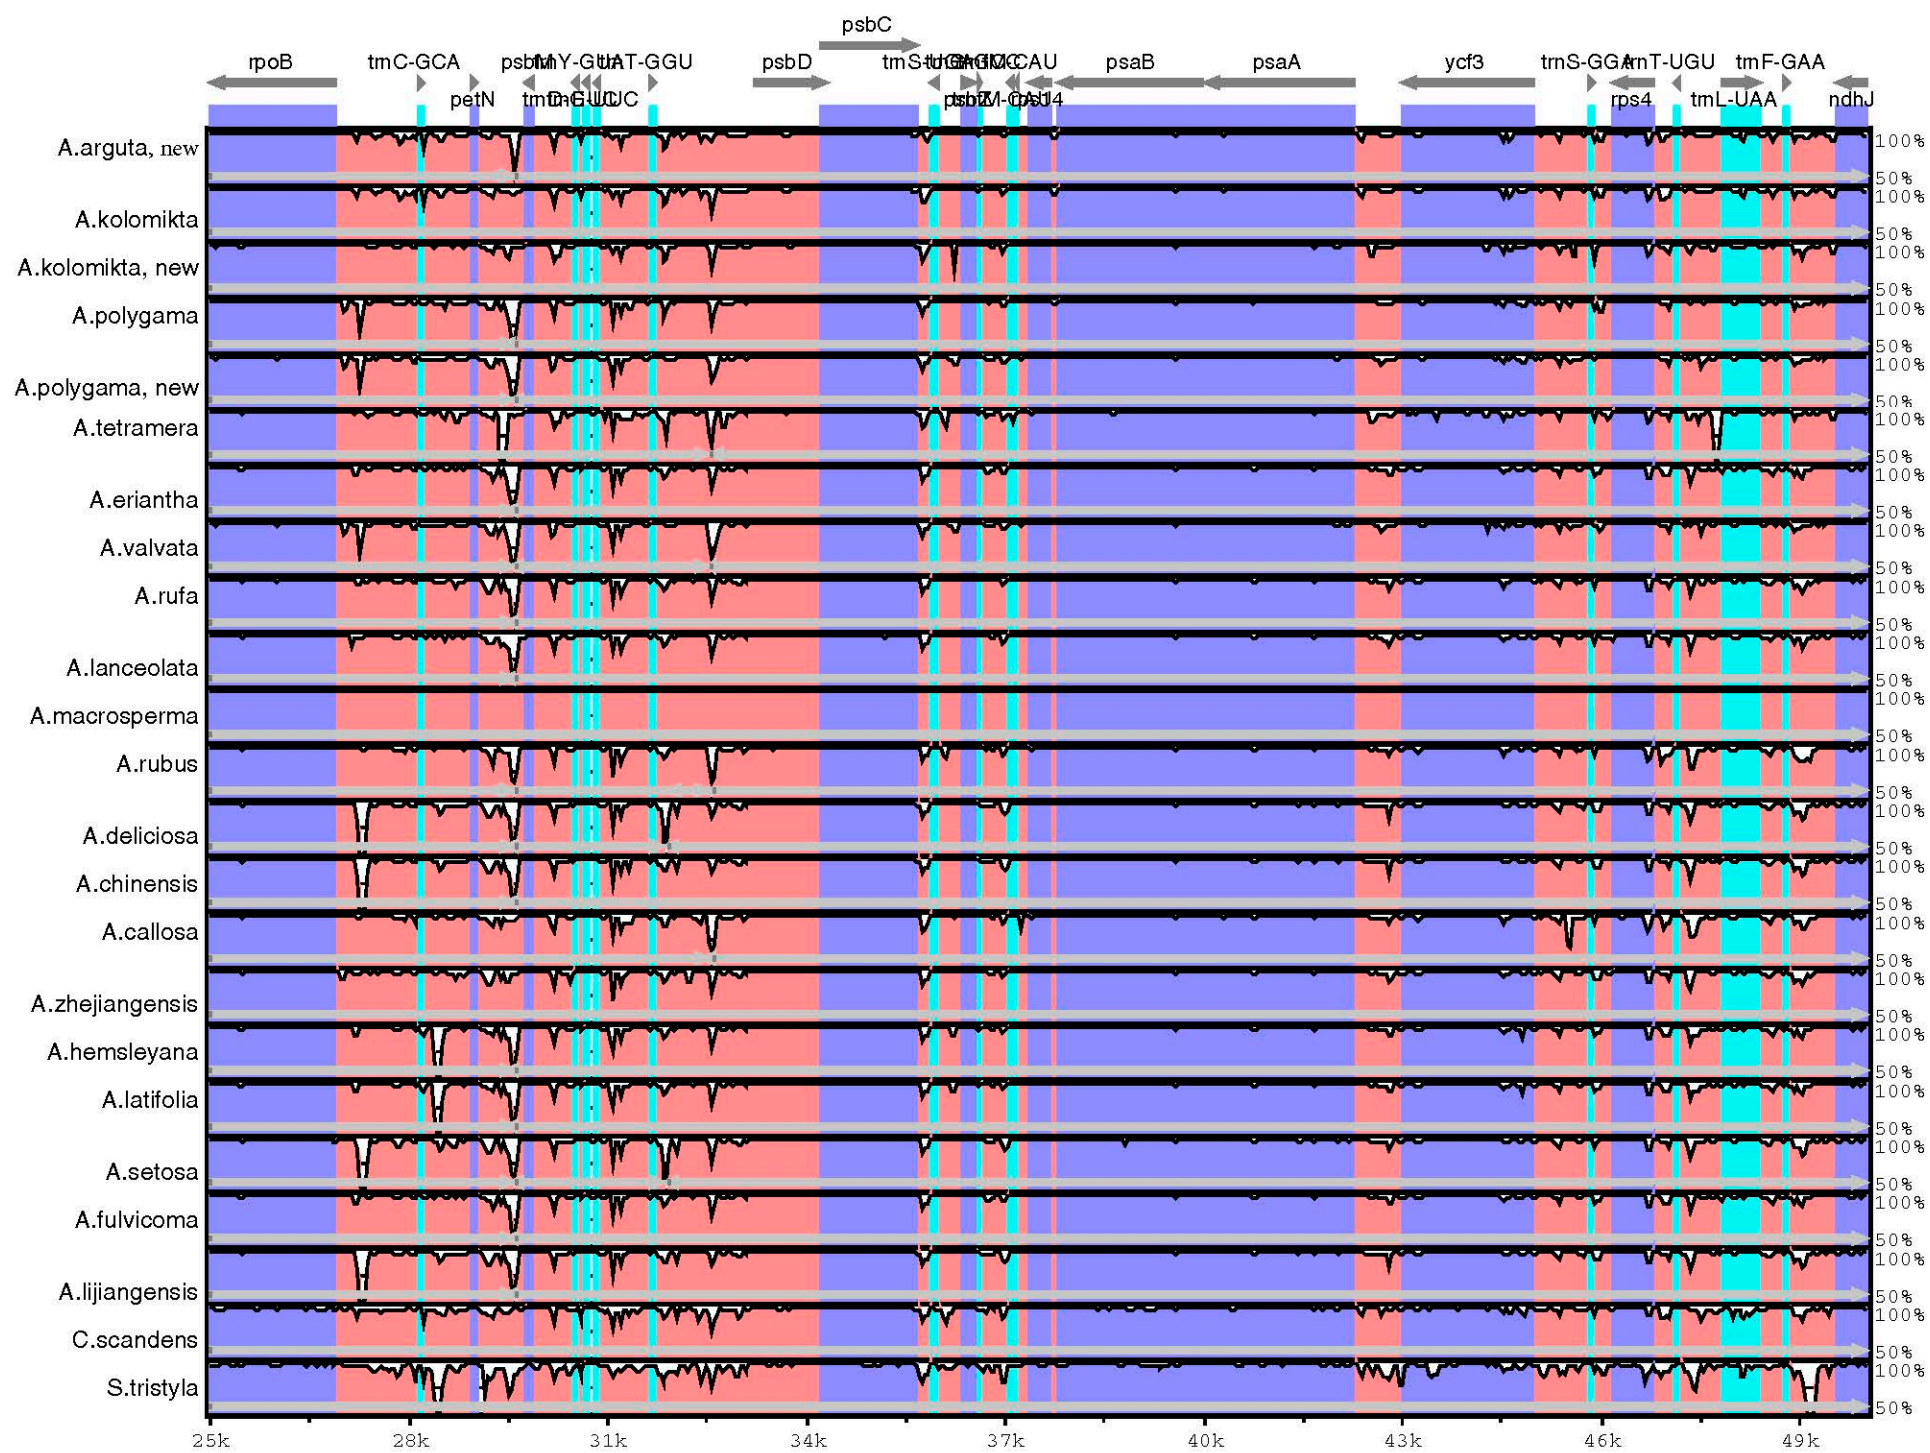



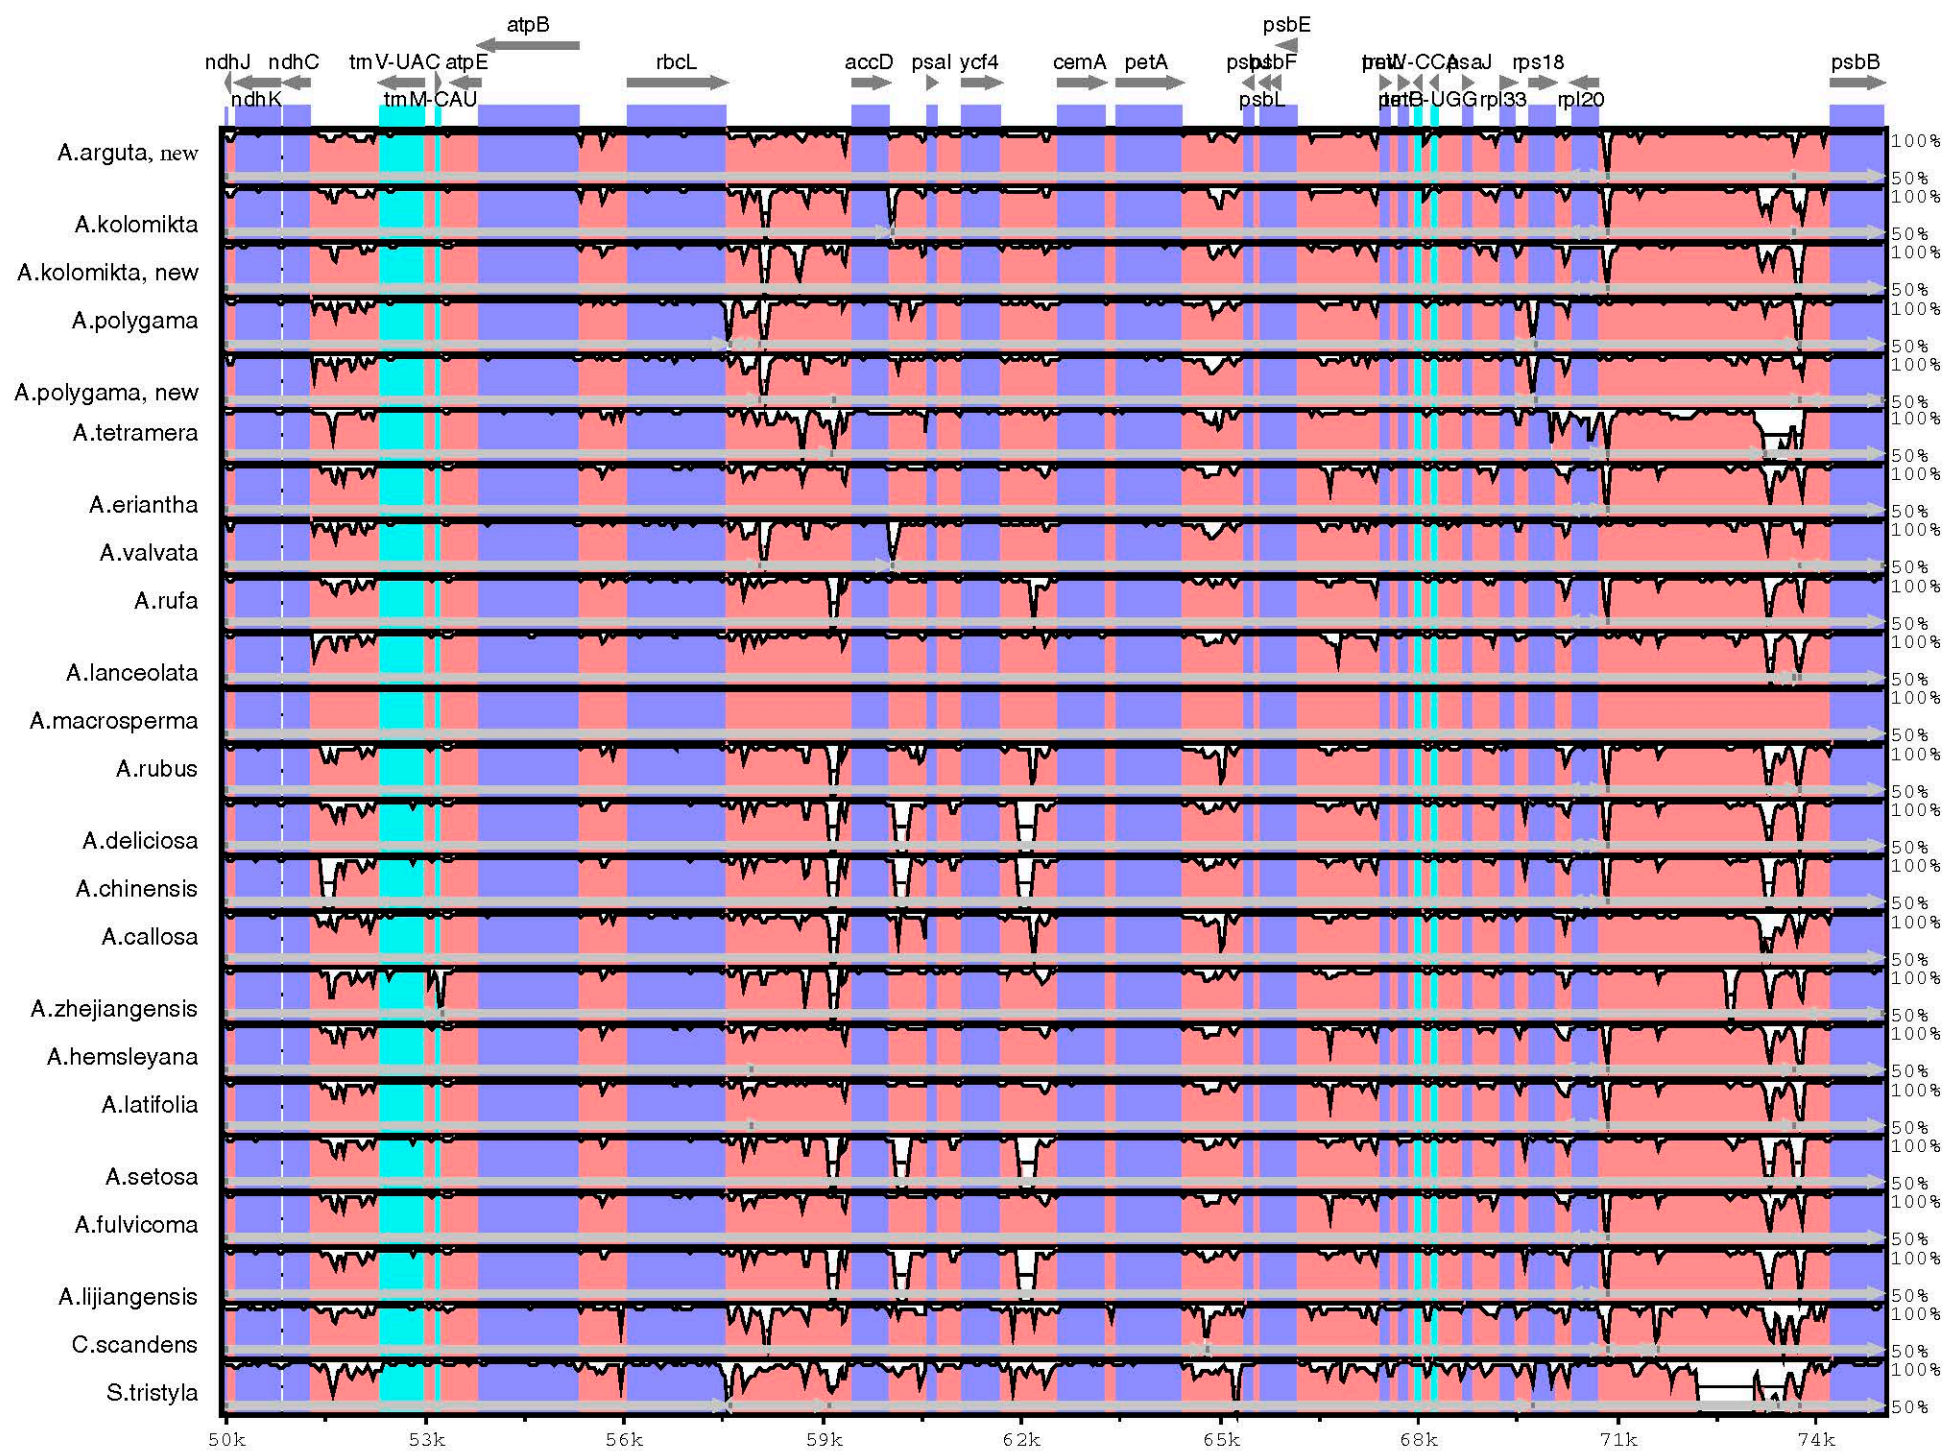

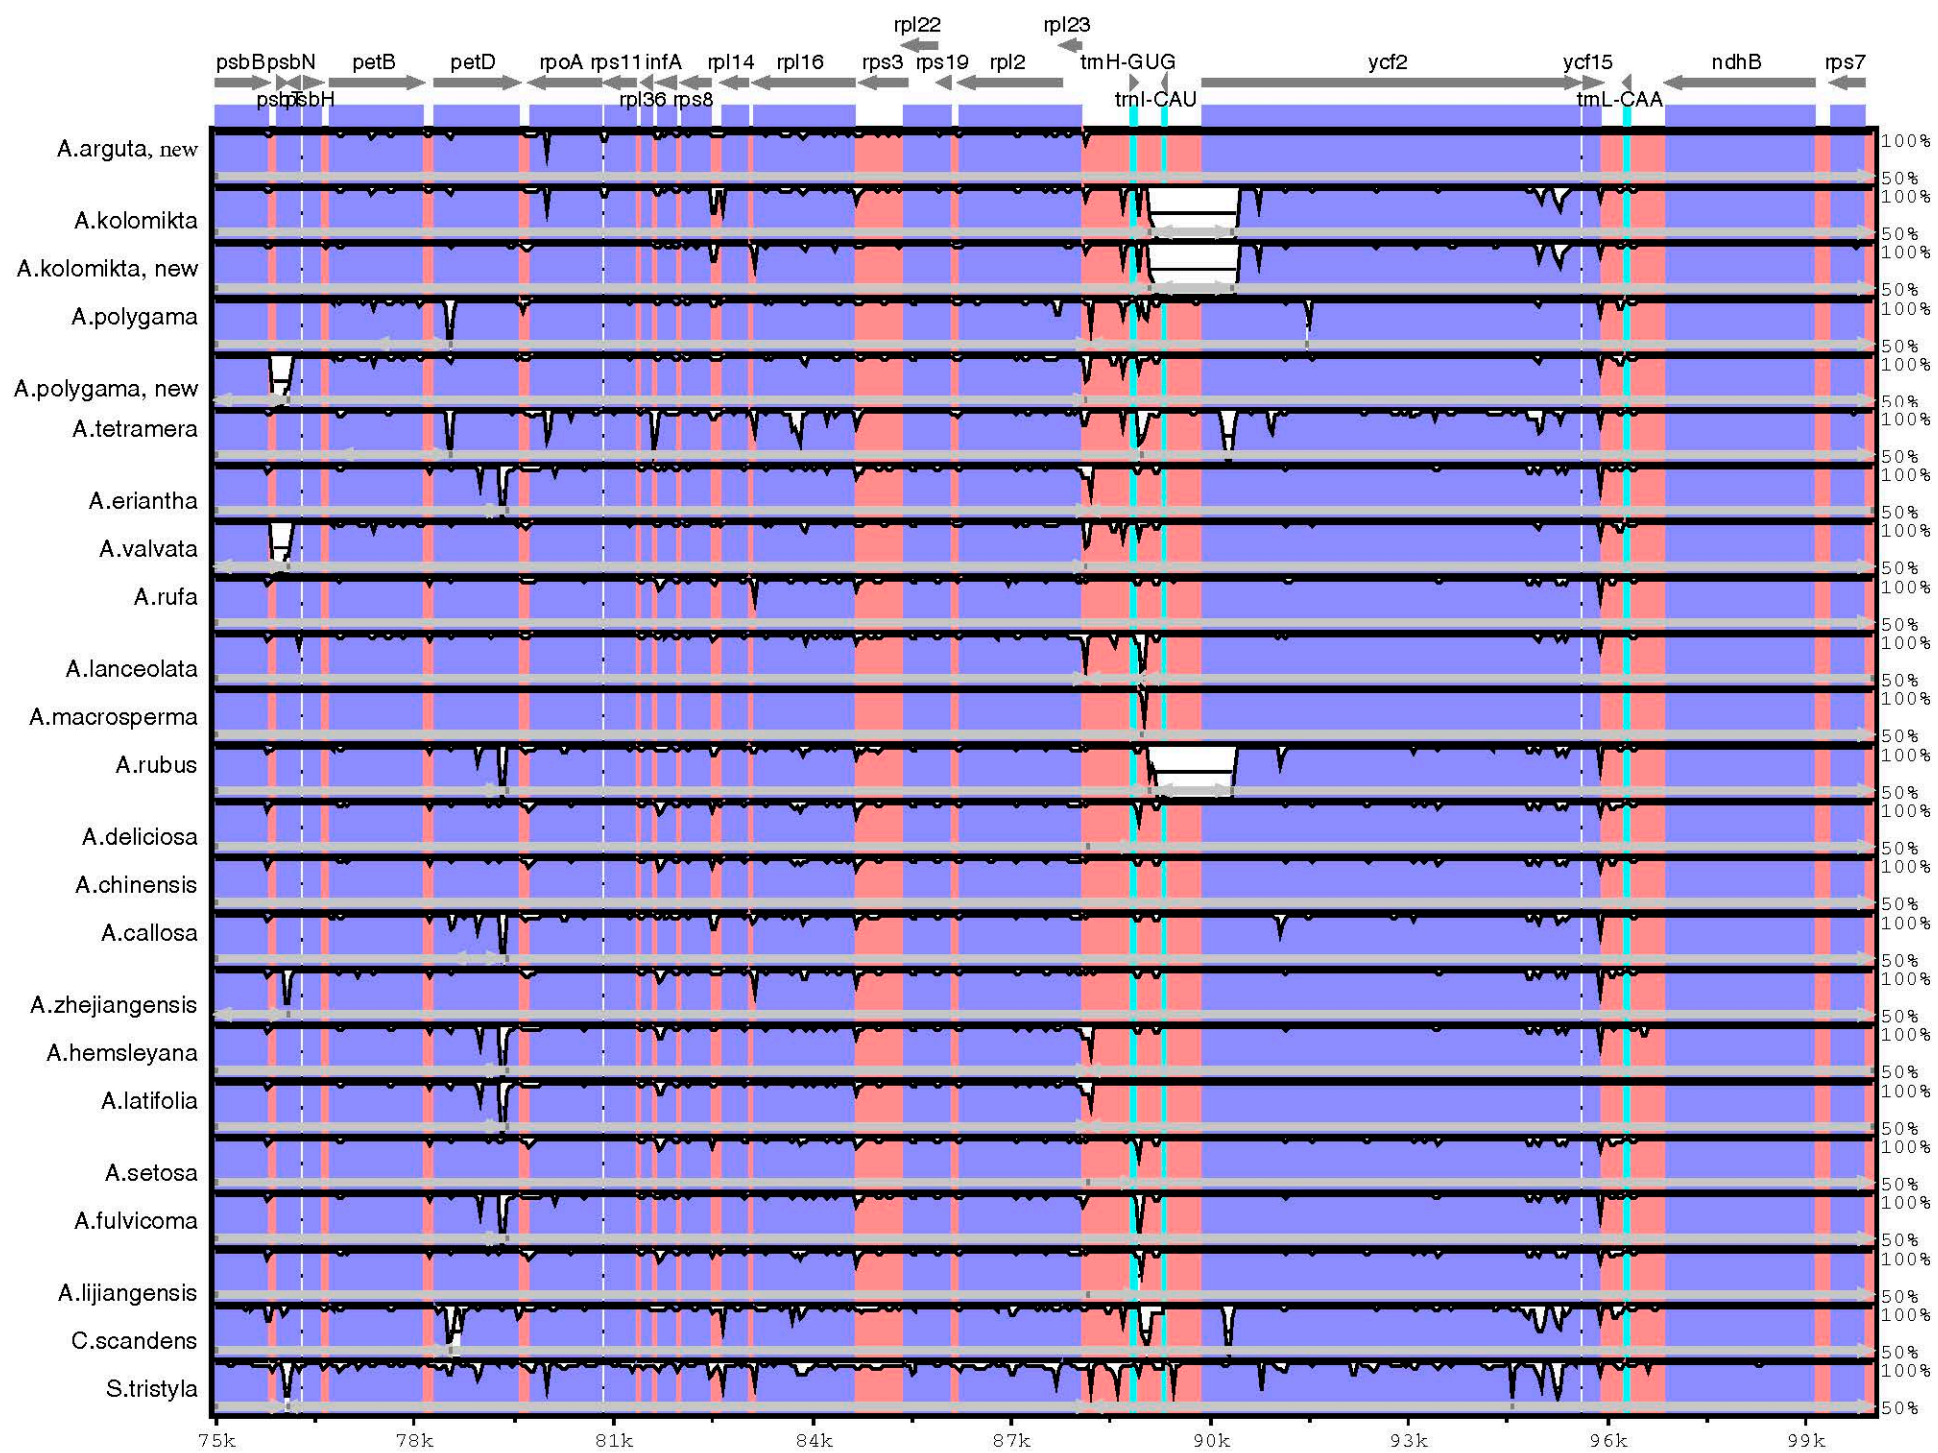



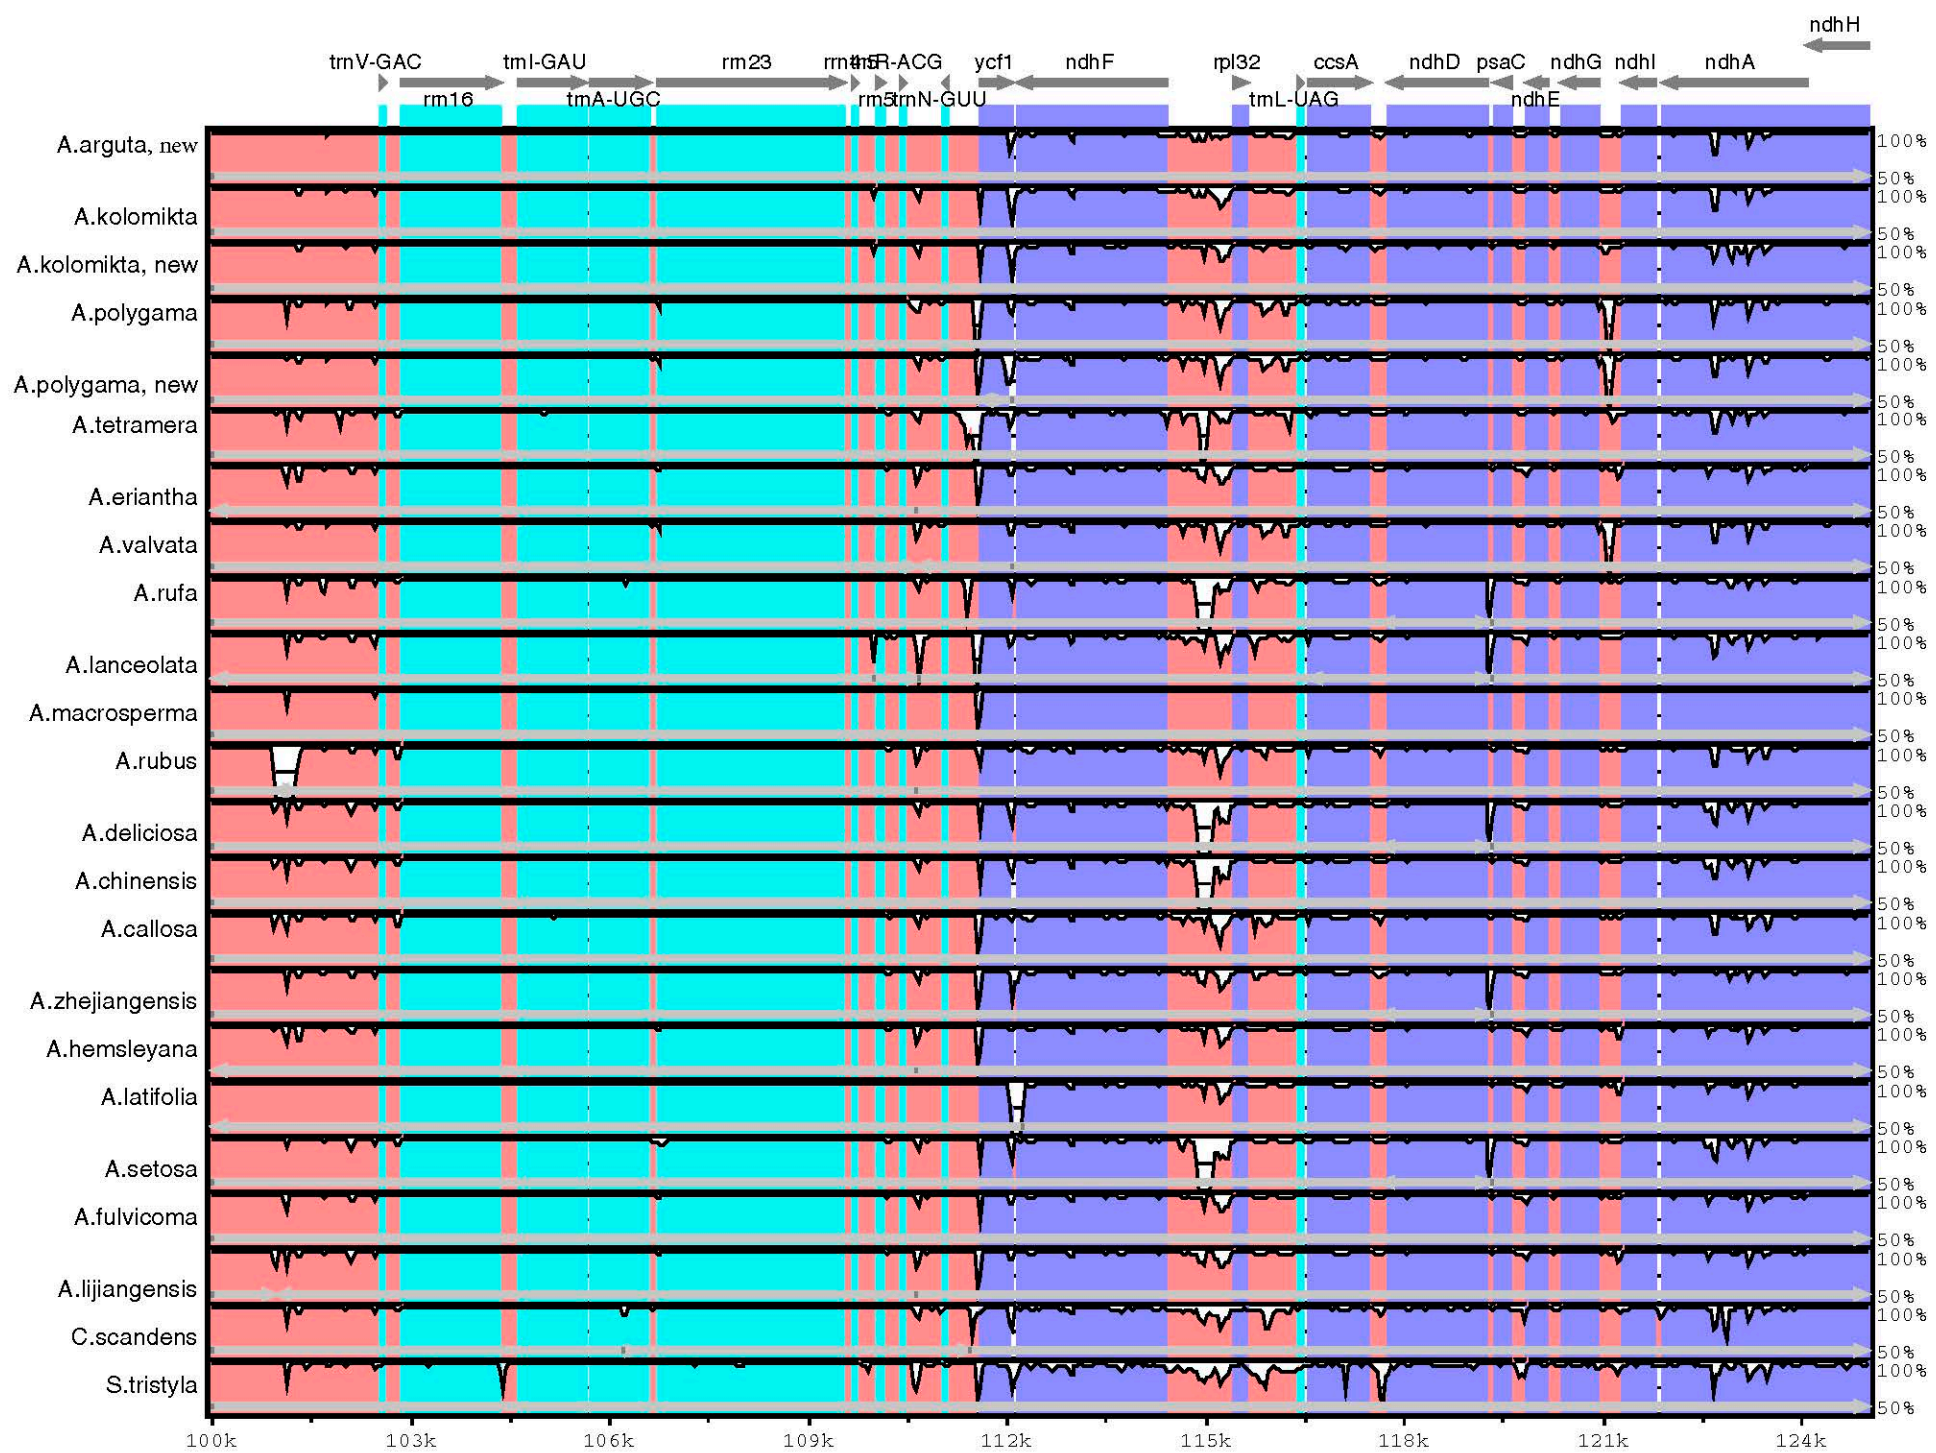

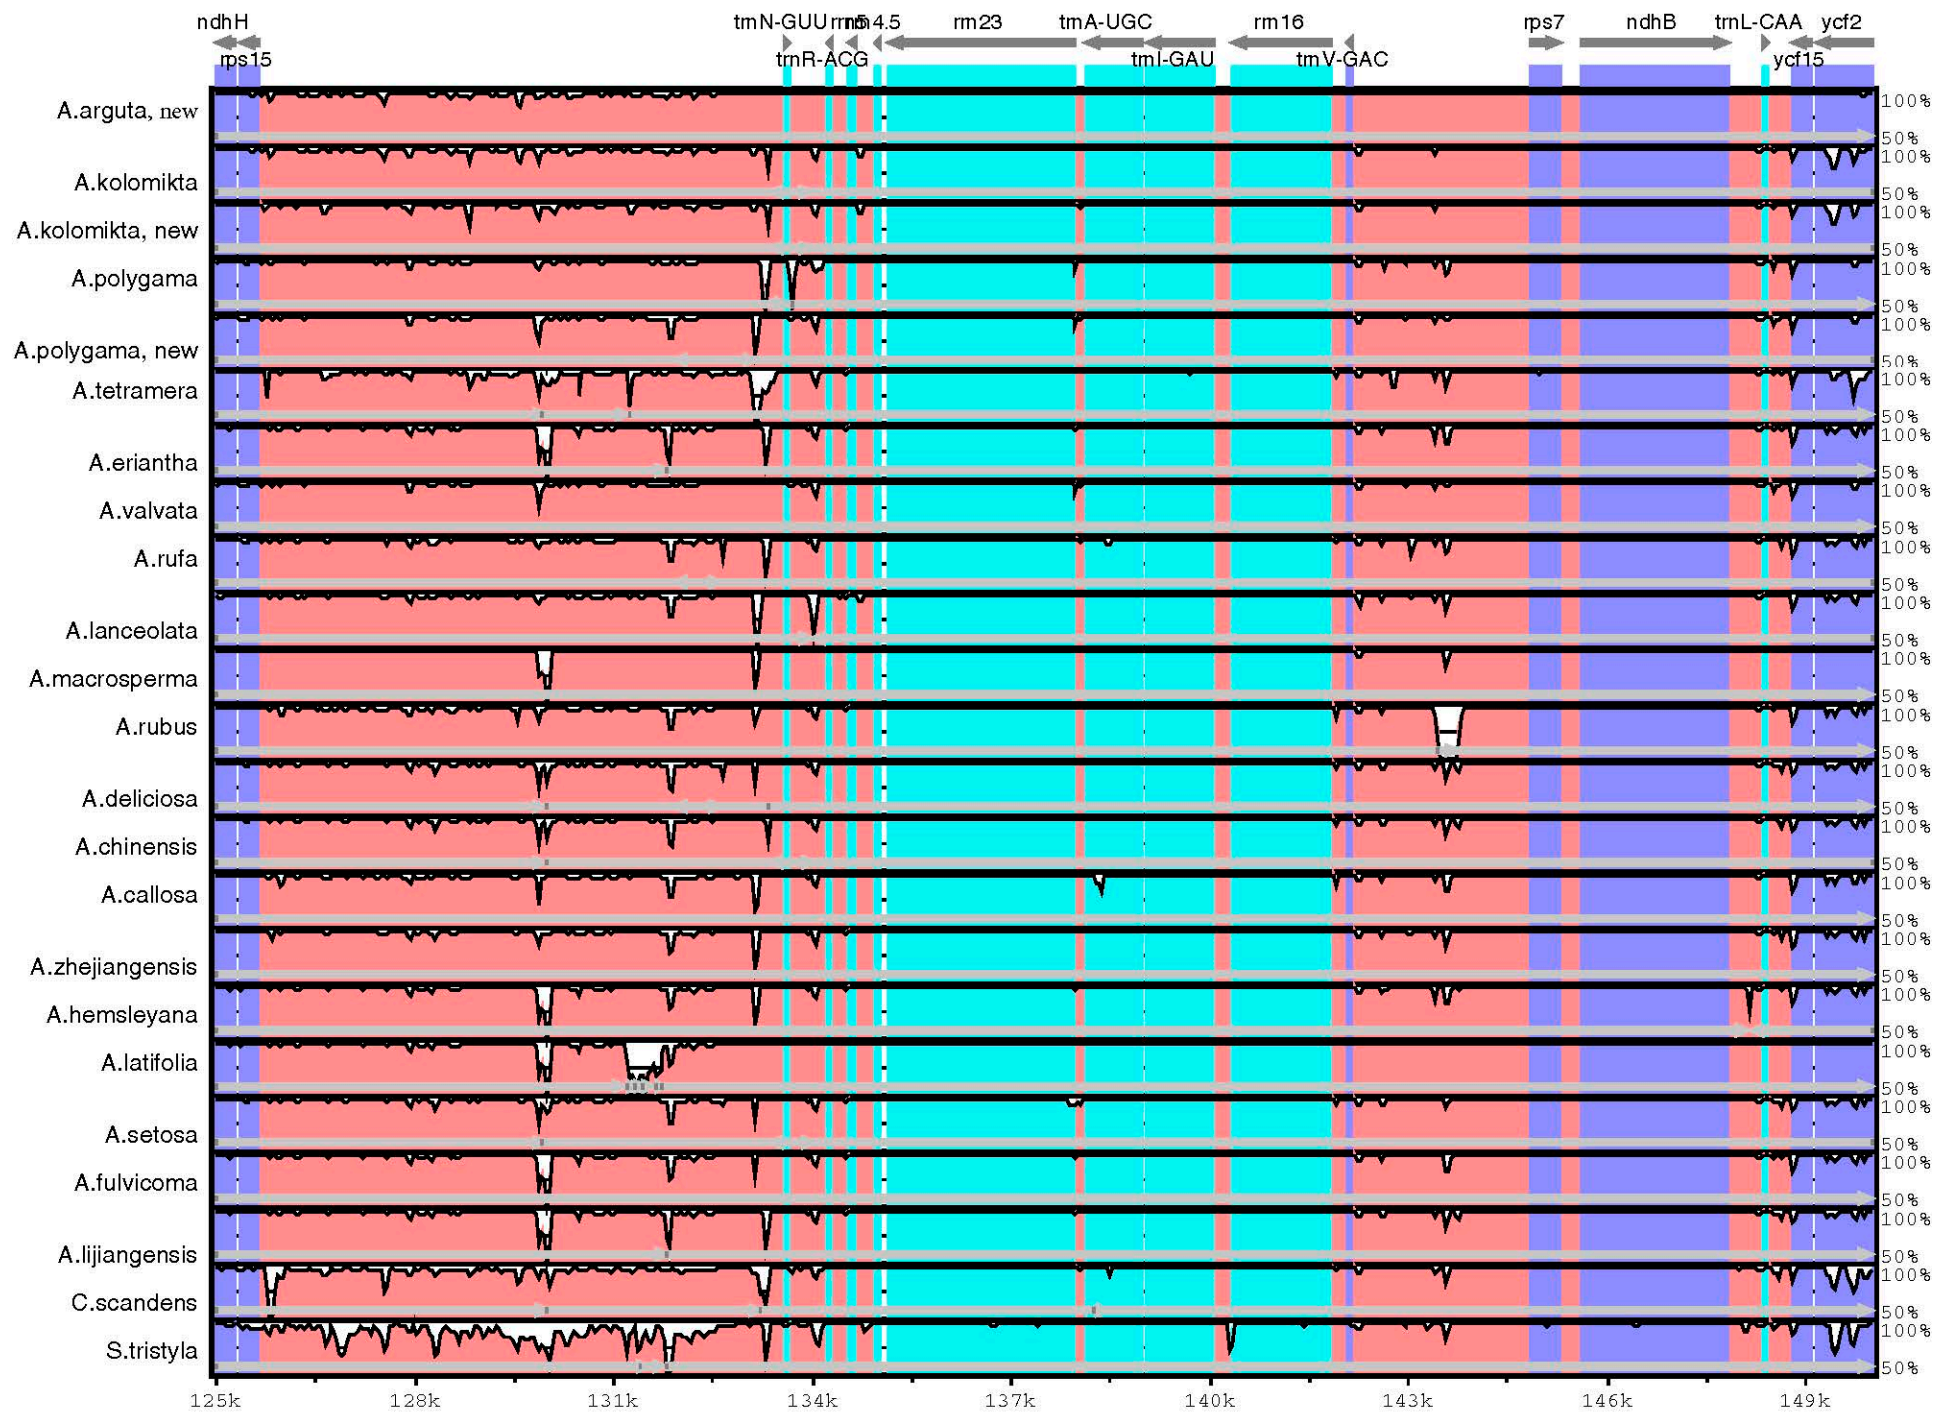

Supplement: s1 [file s1]

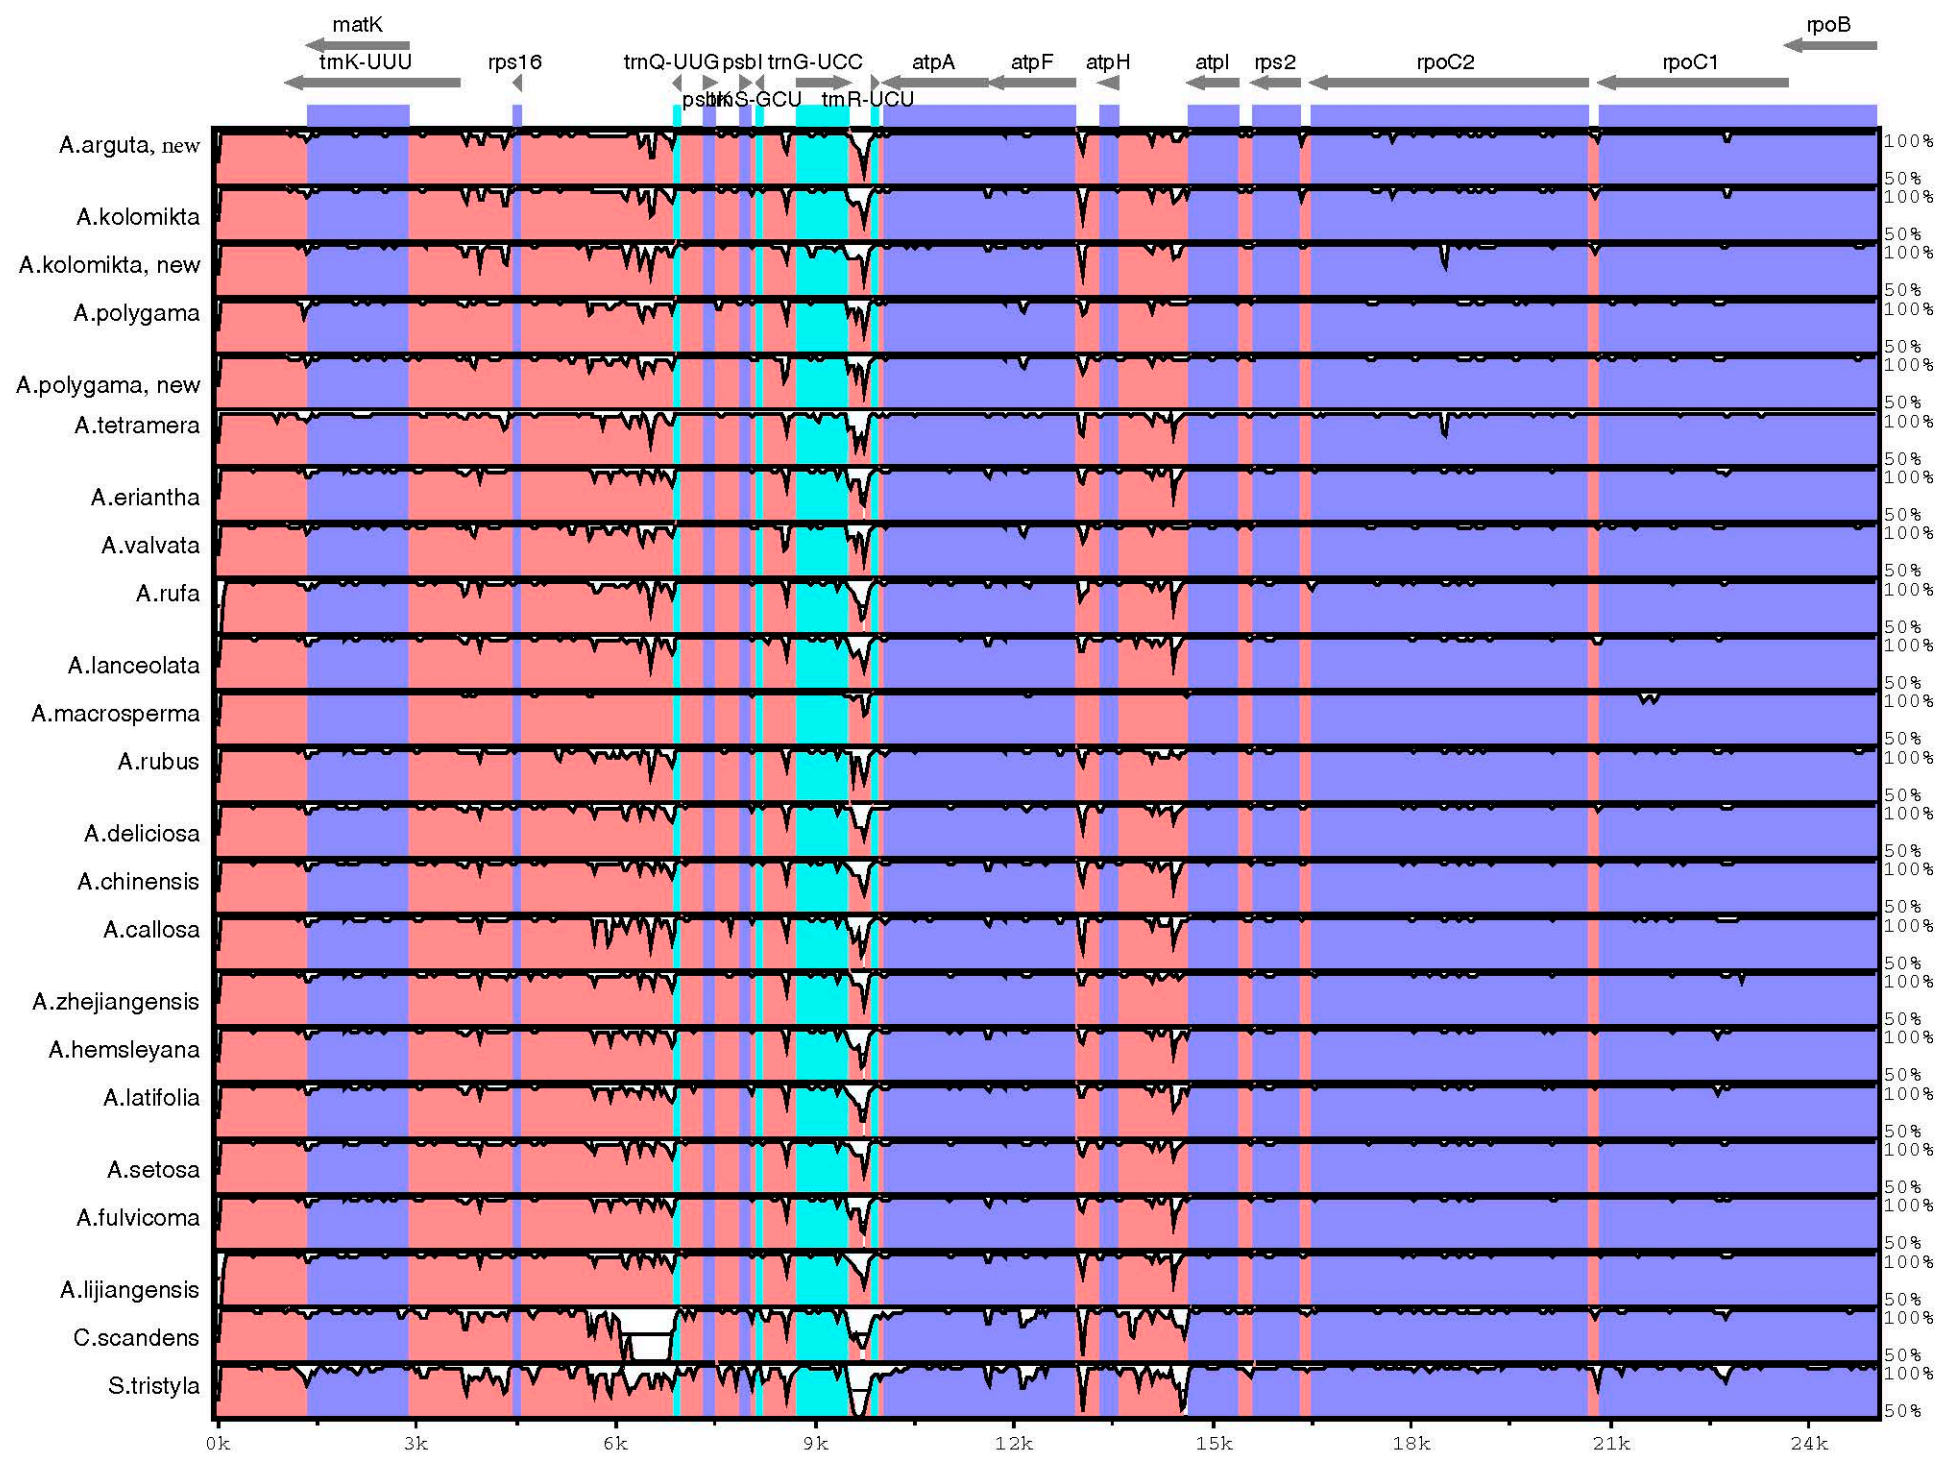

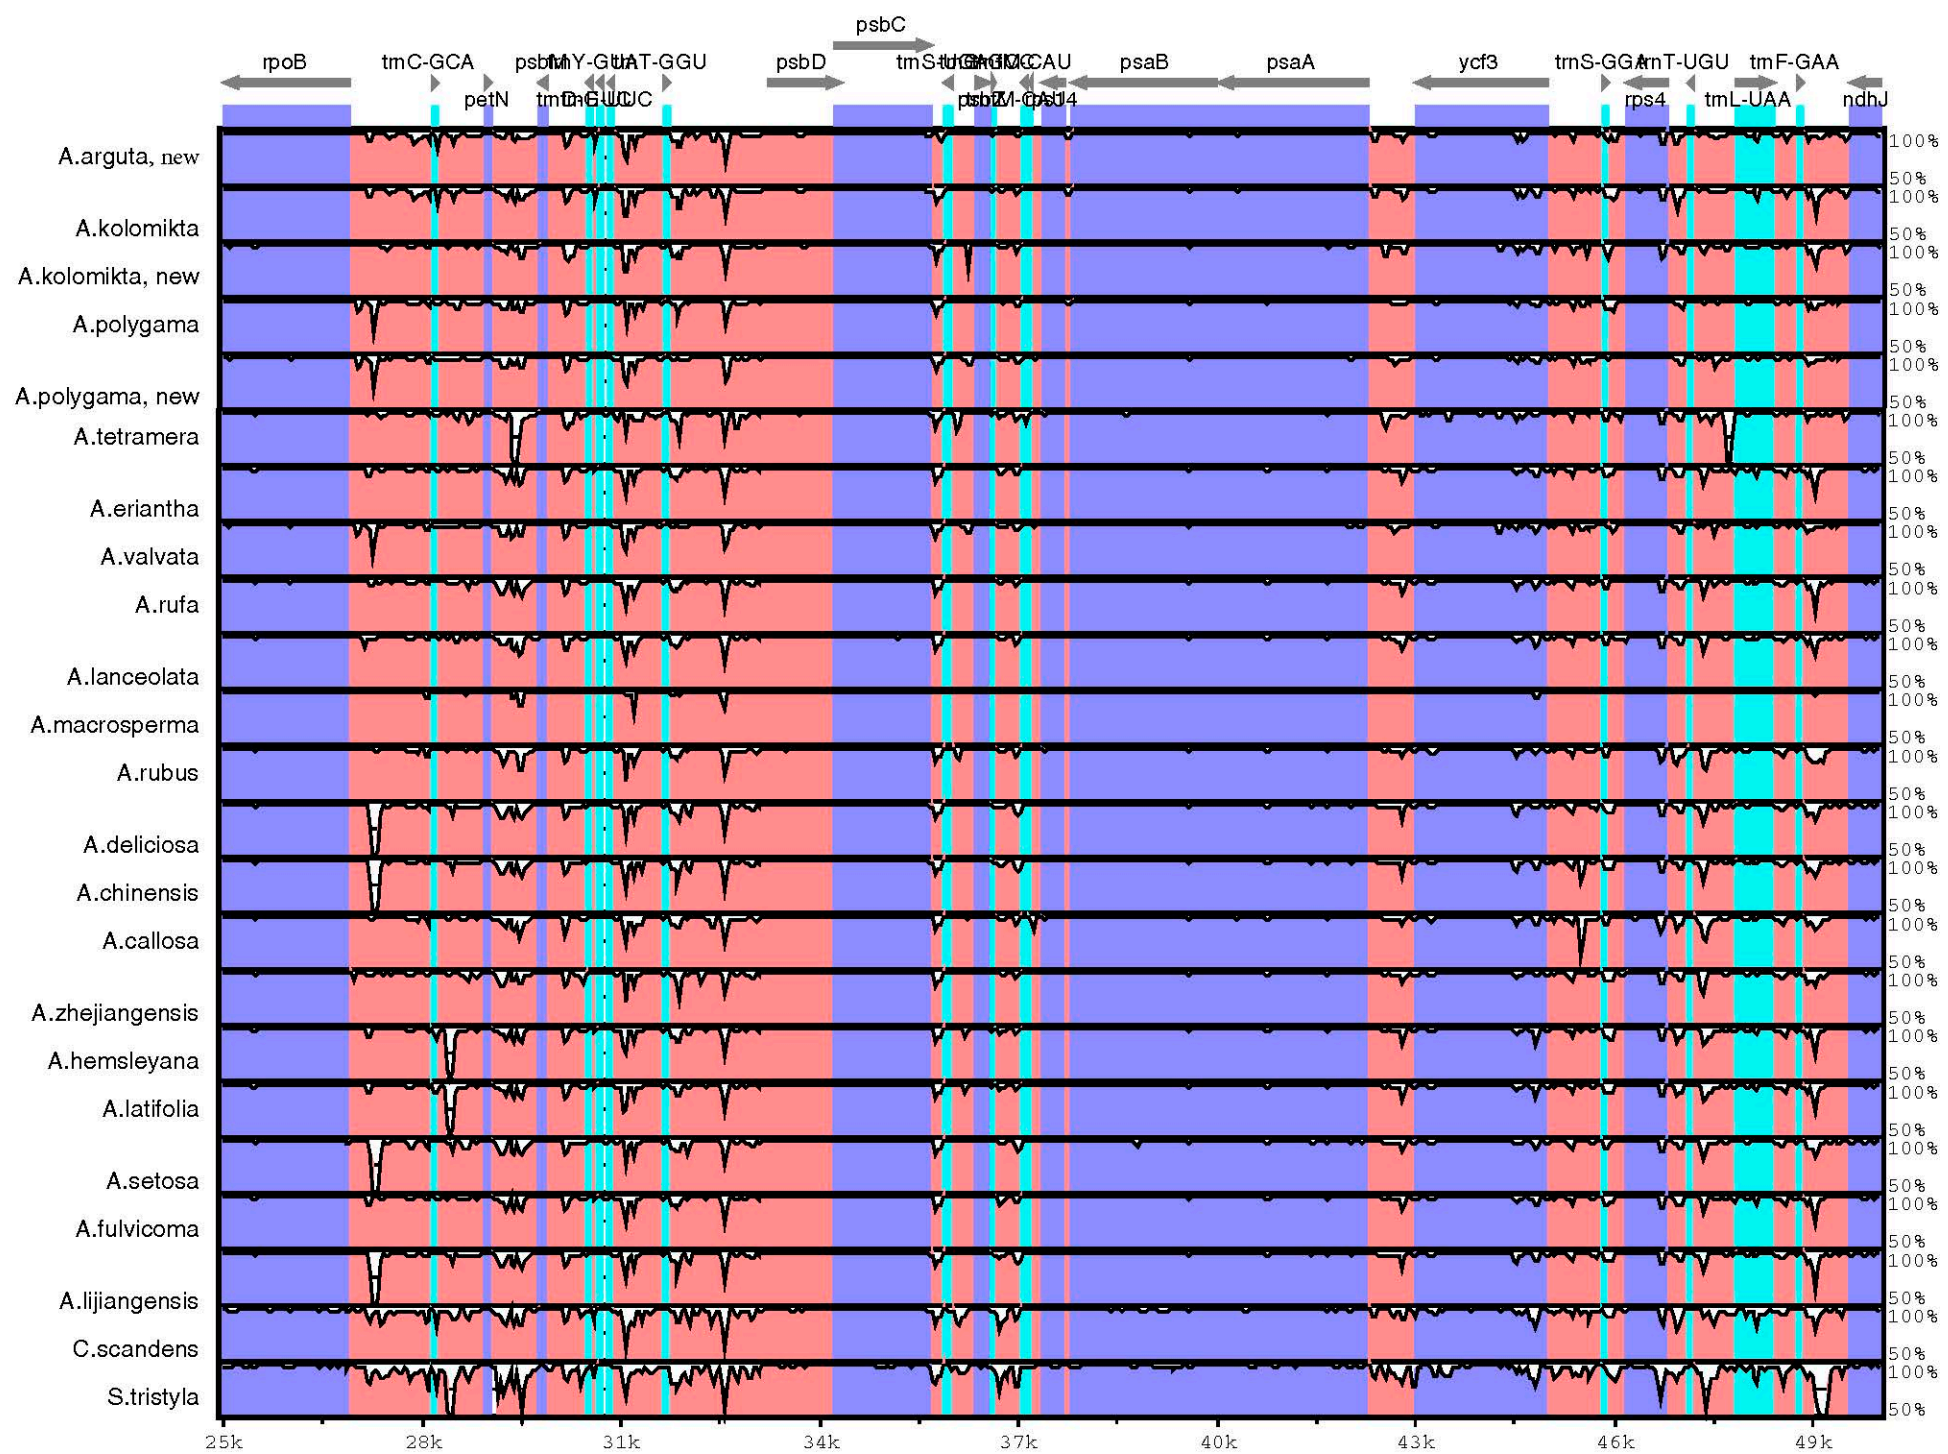



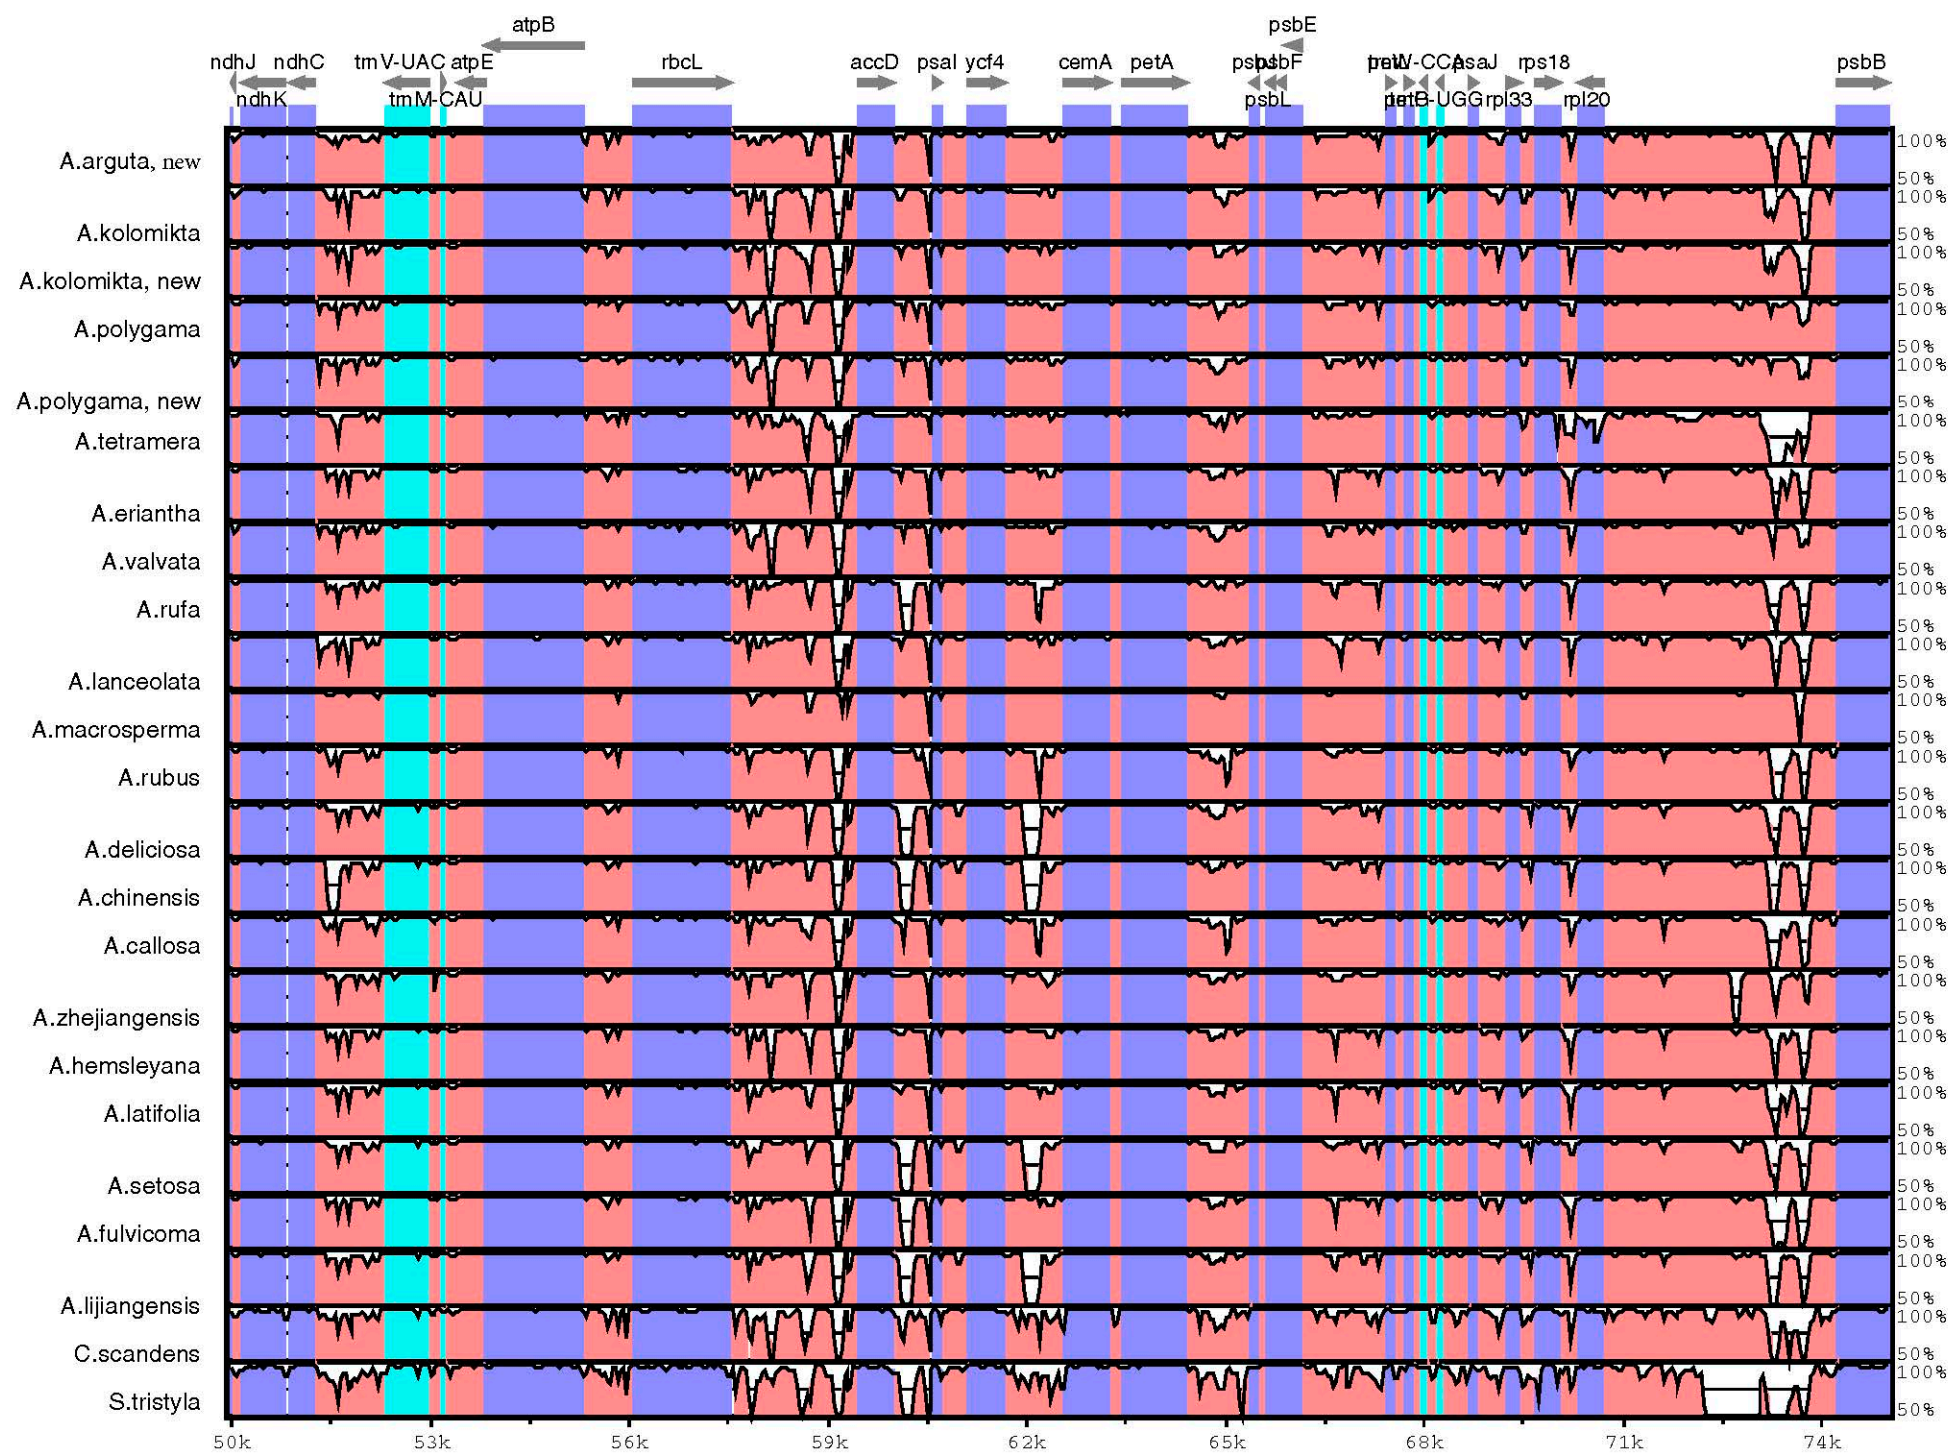

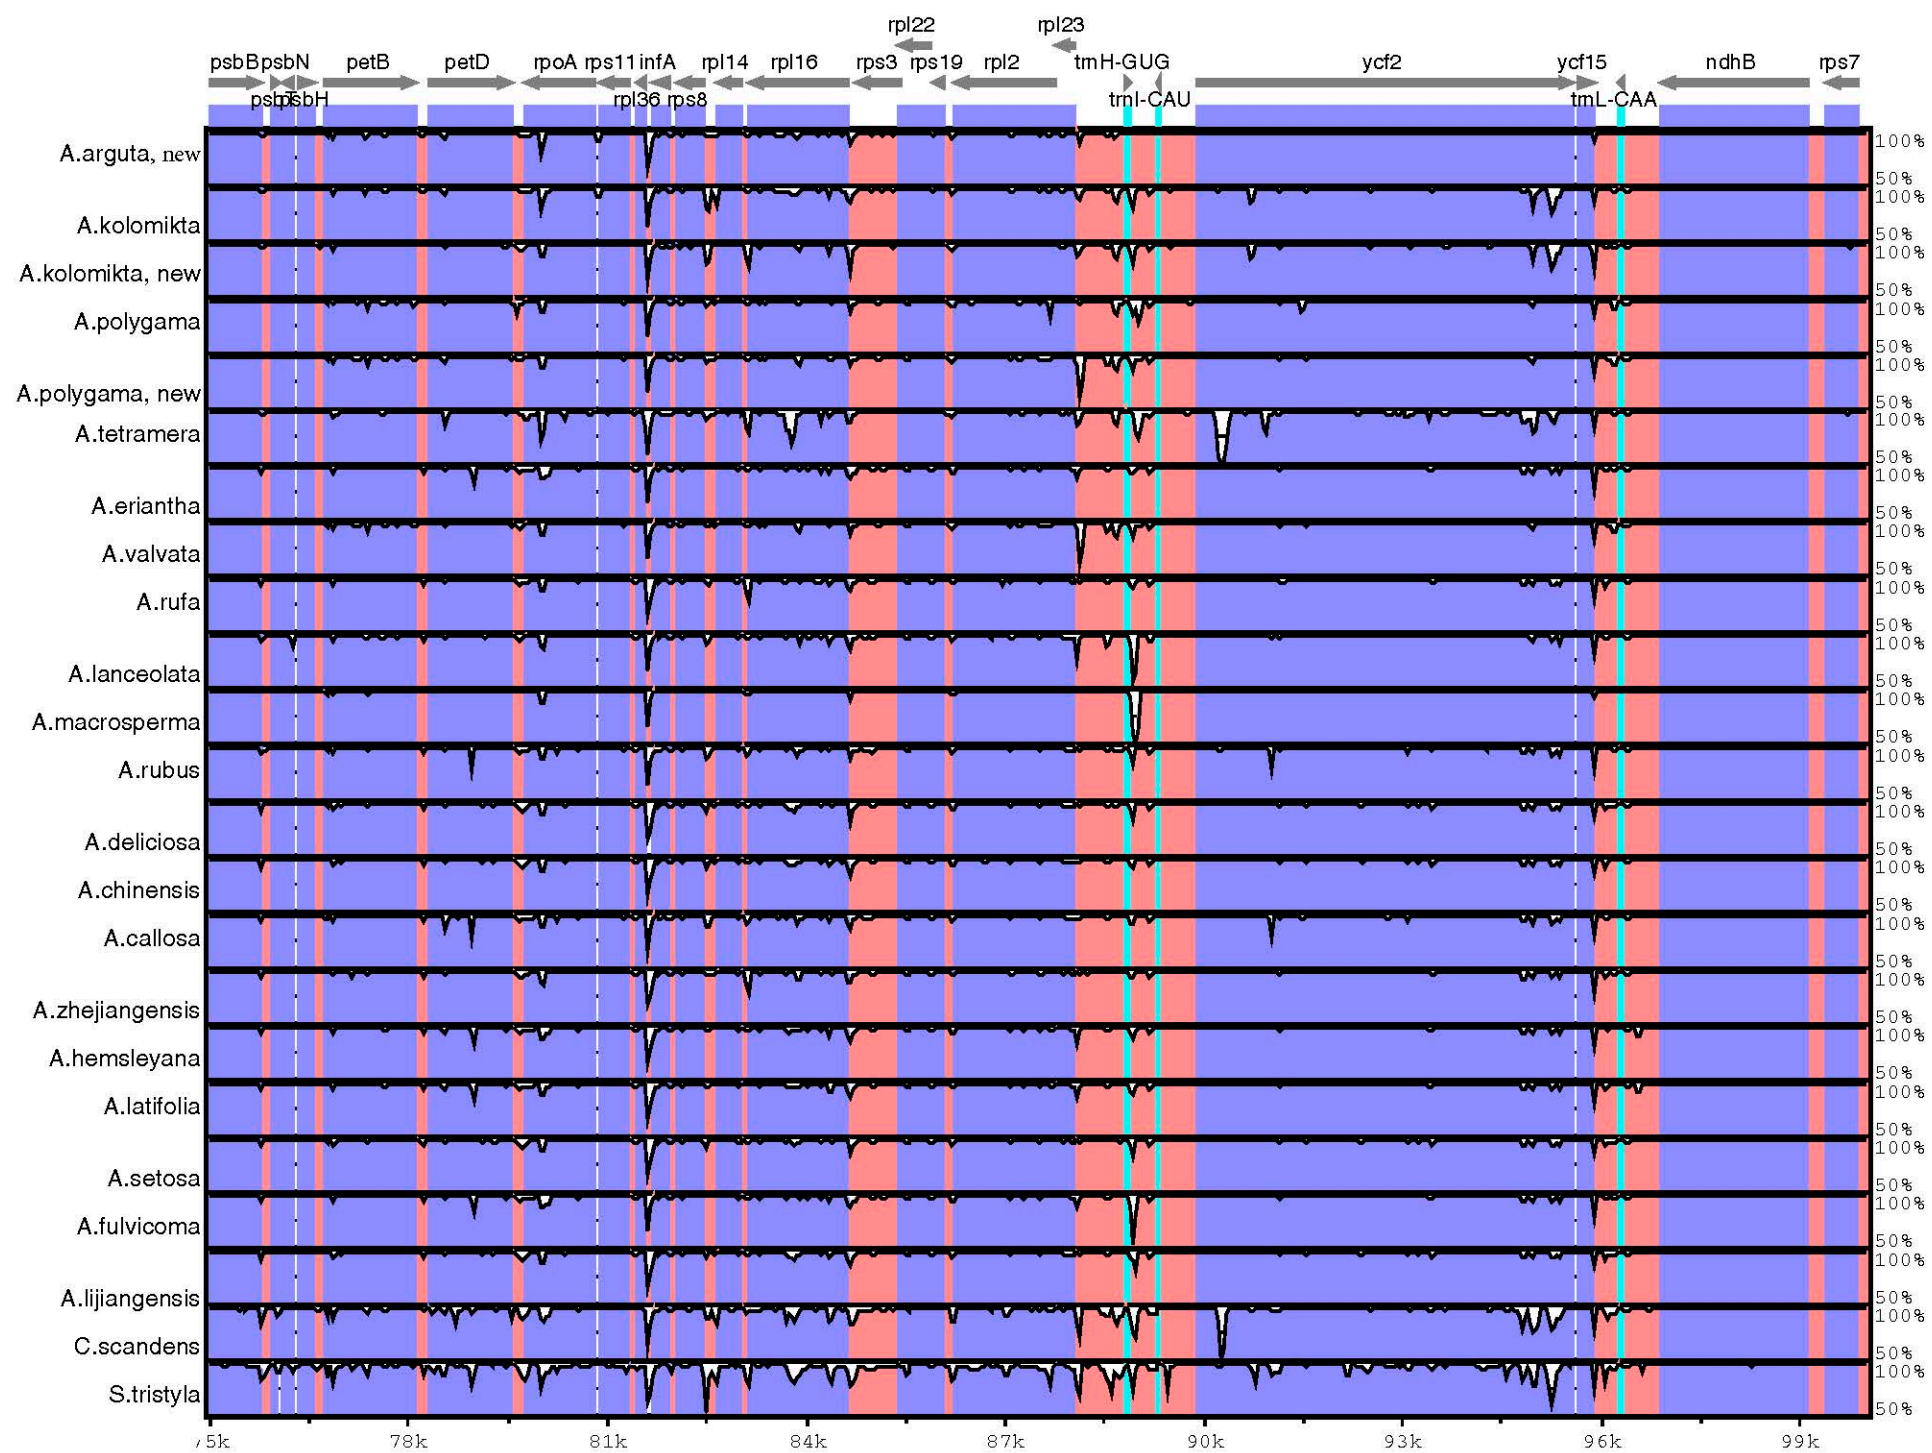



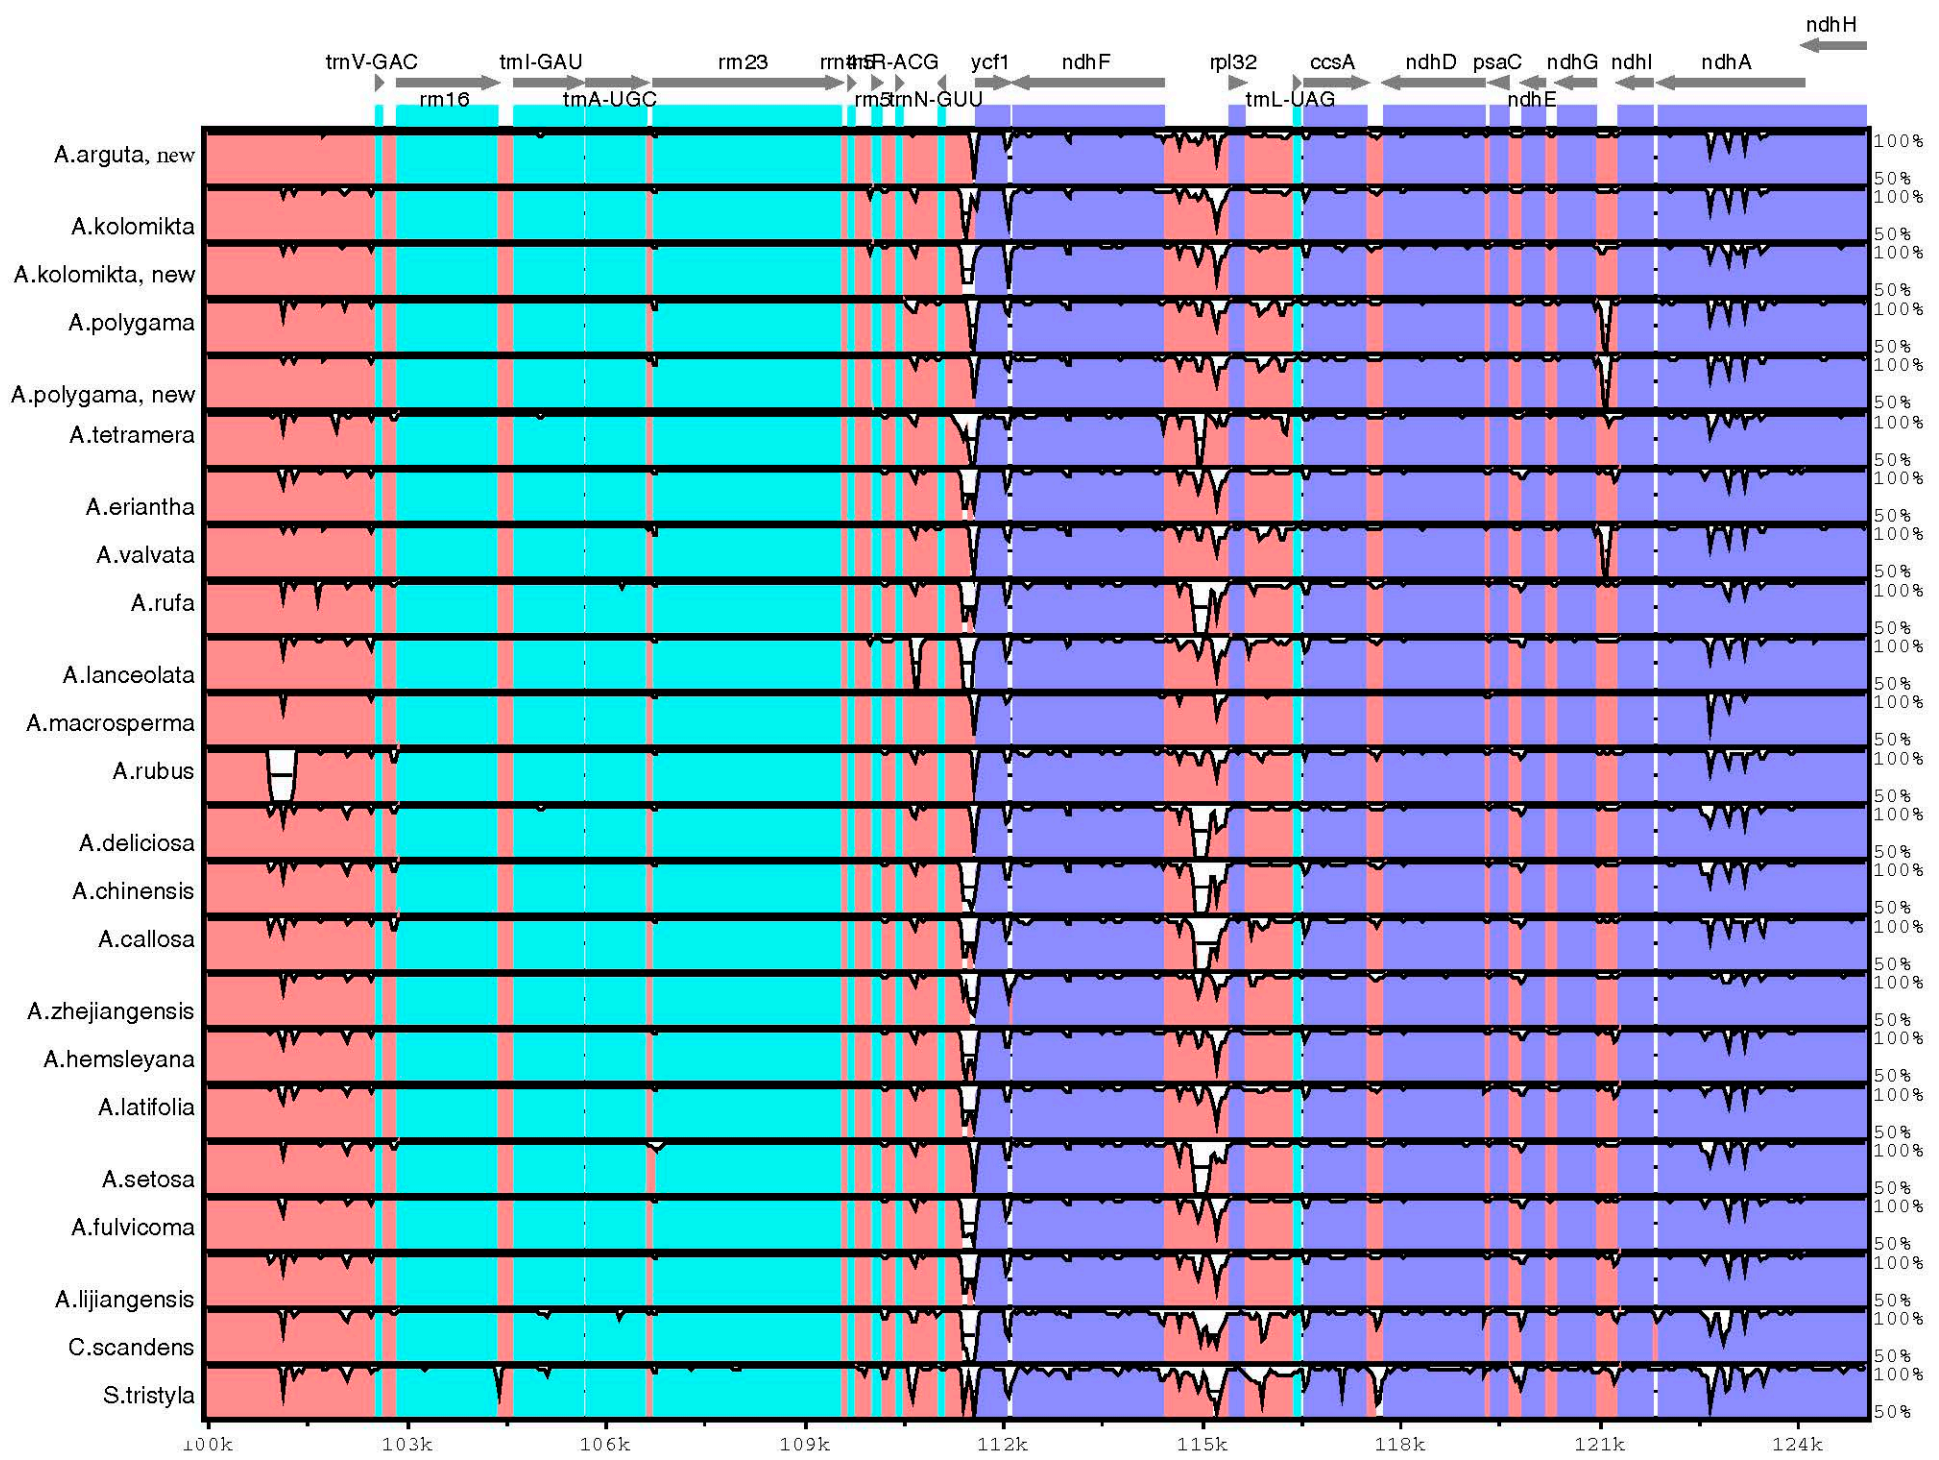

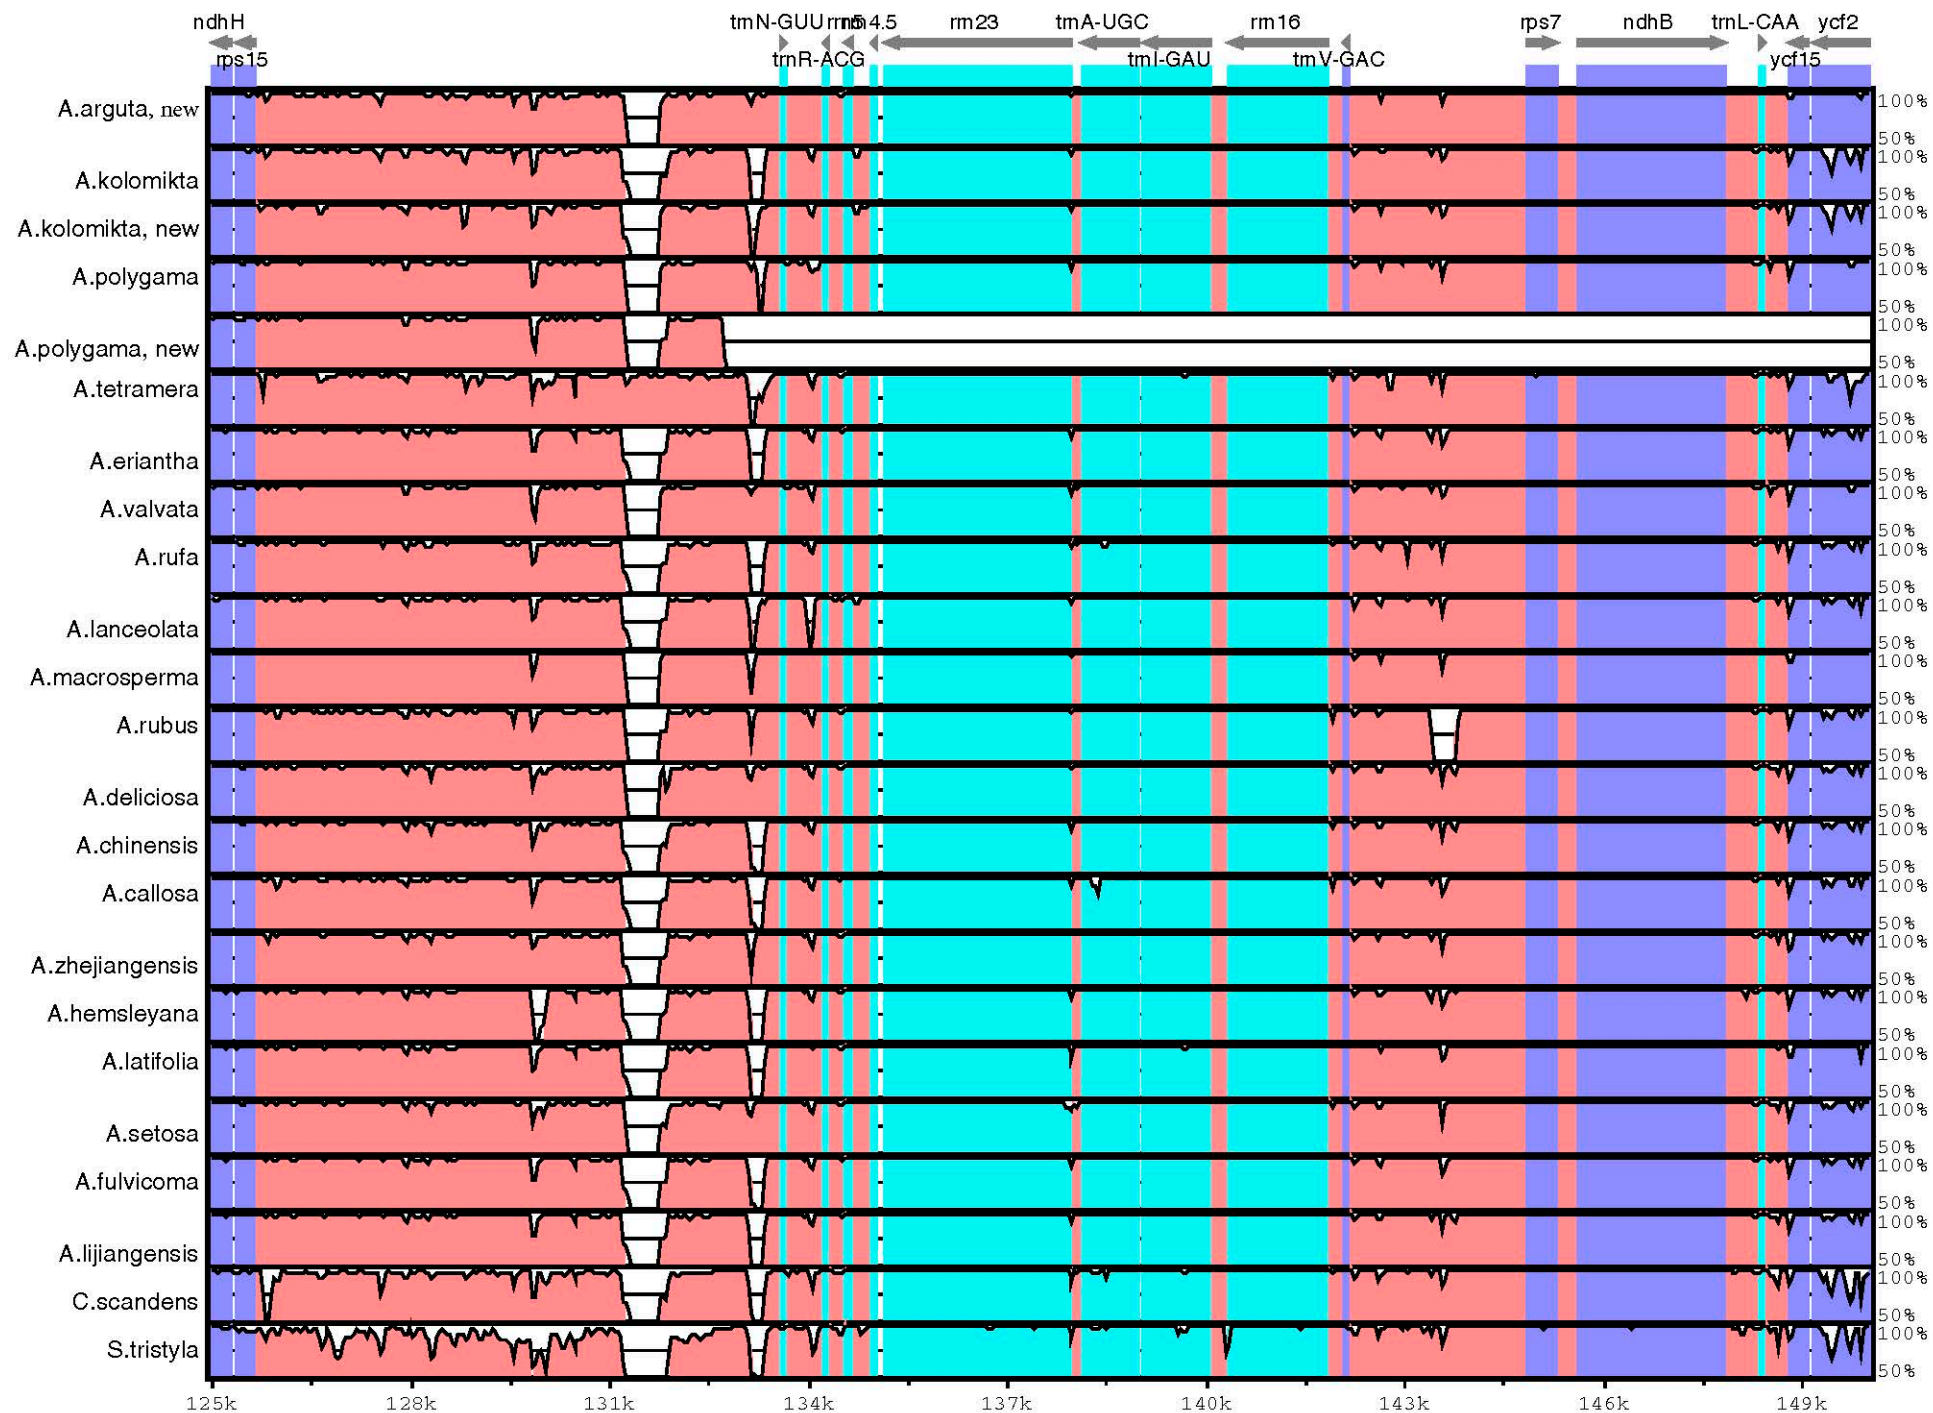

Supplement: s1 [file s1]

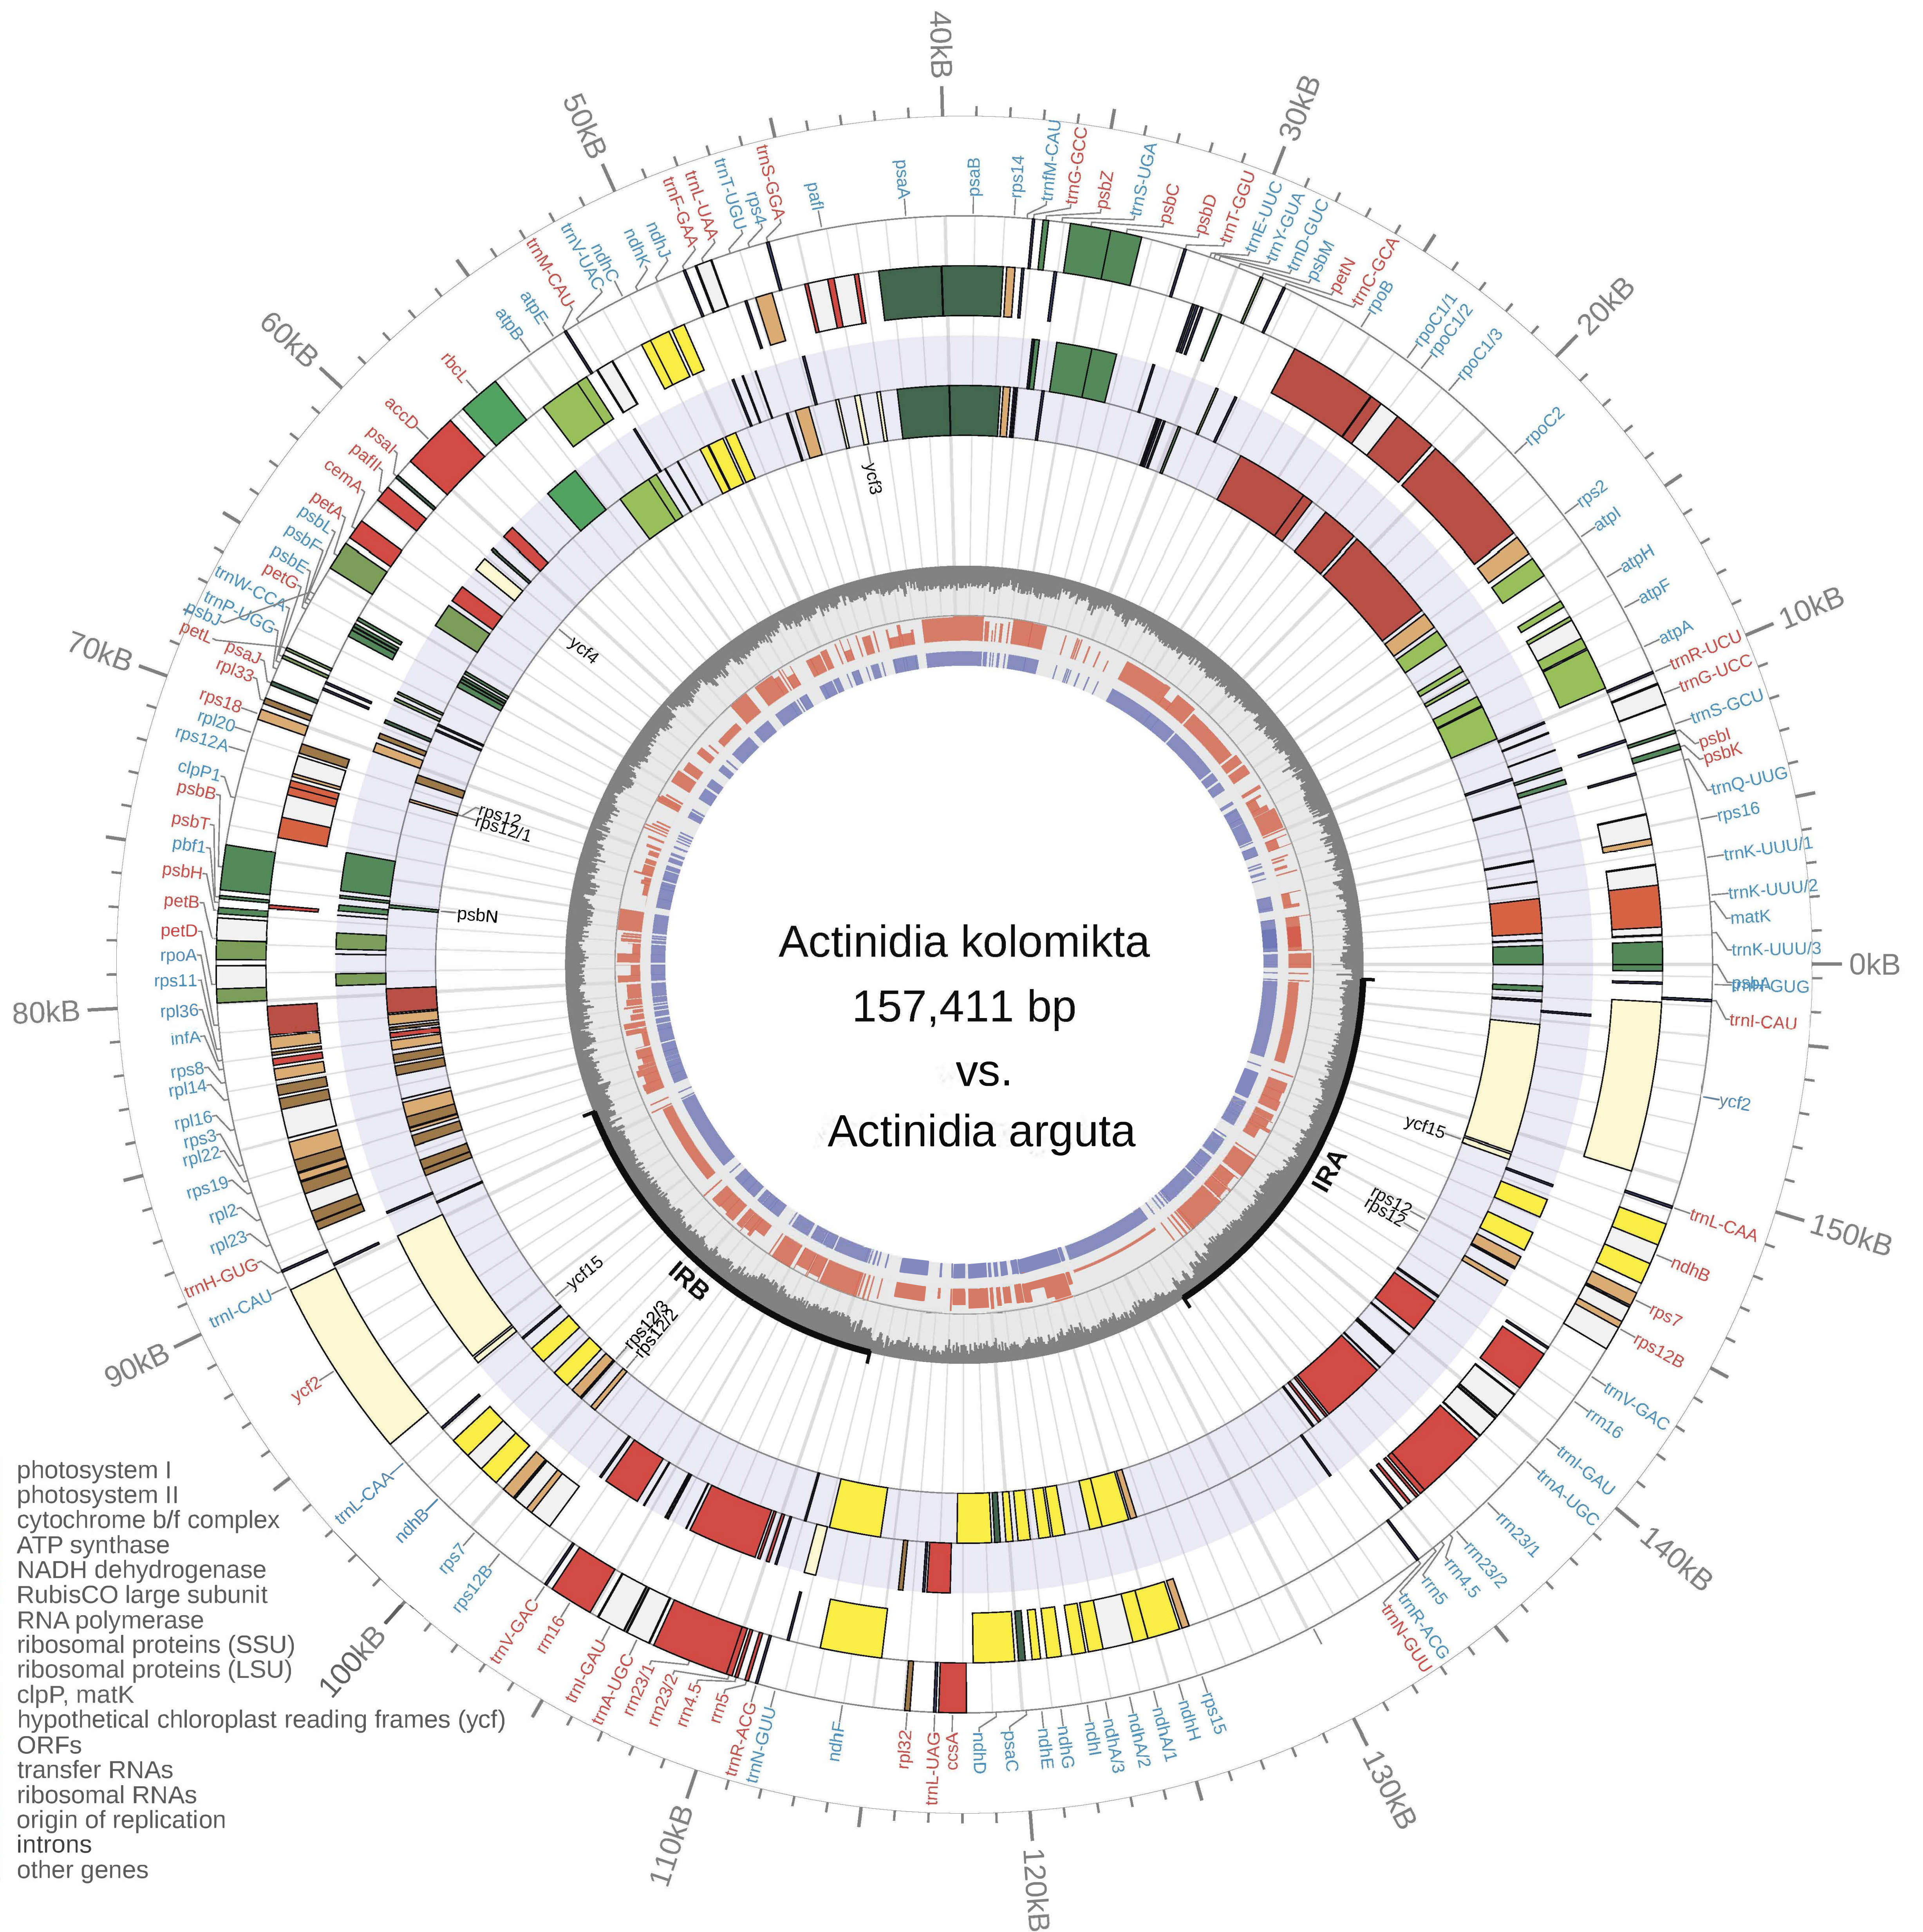



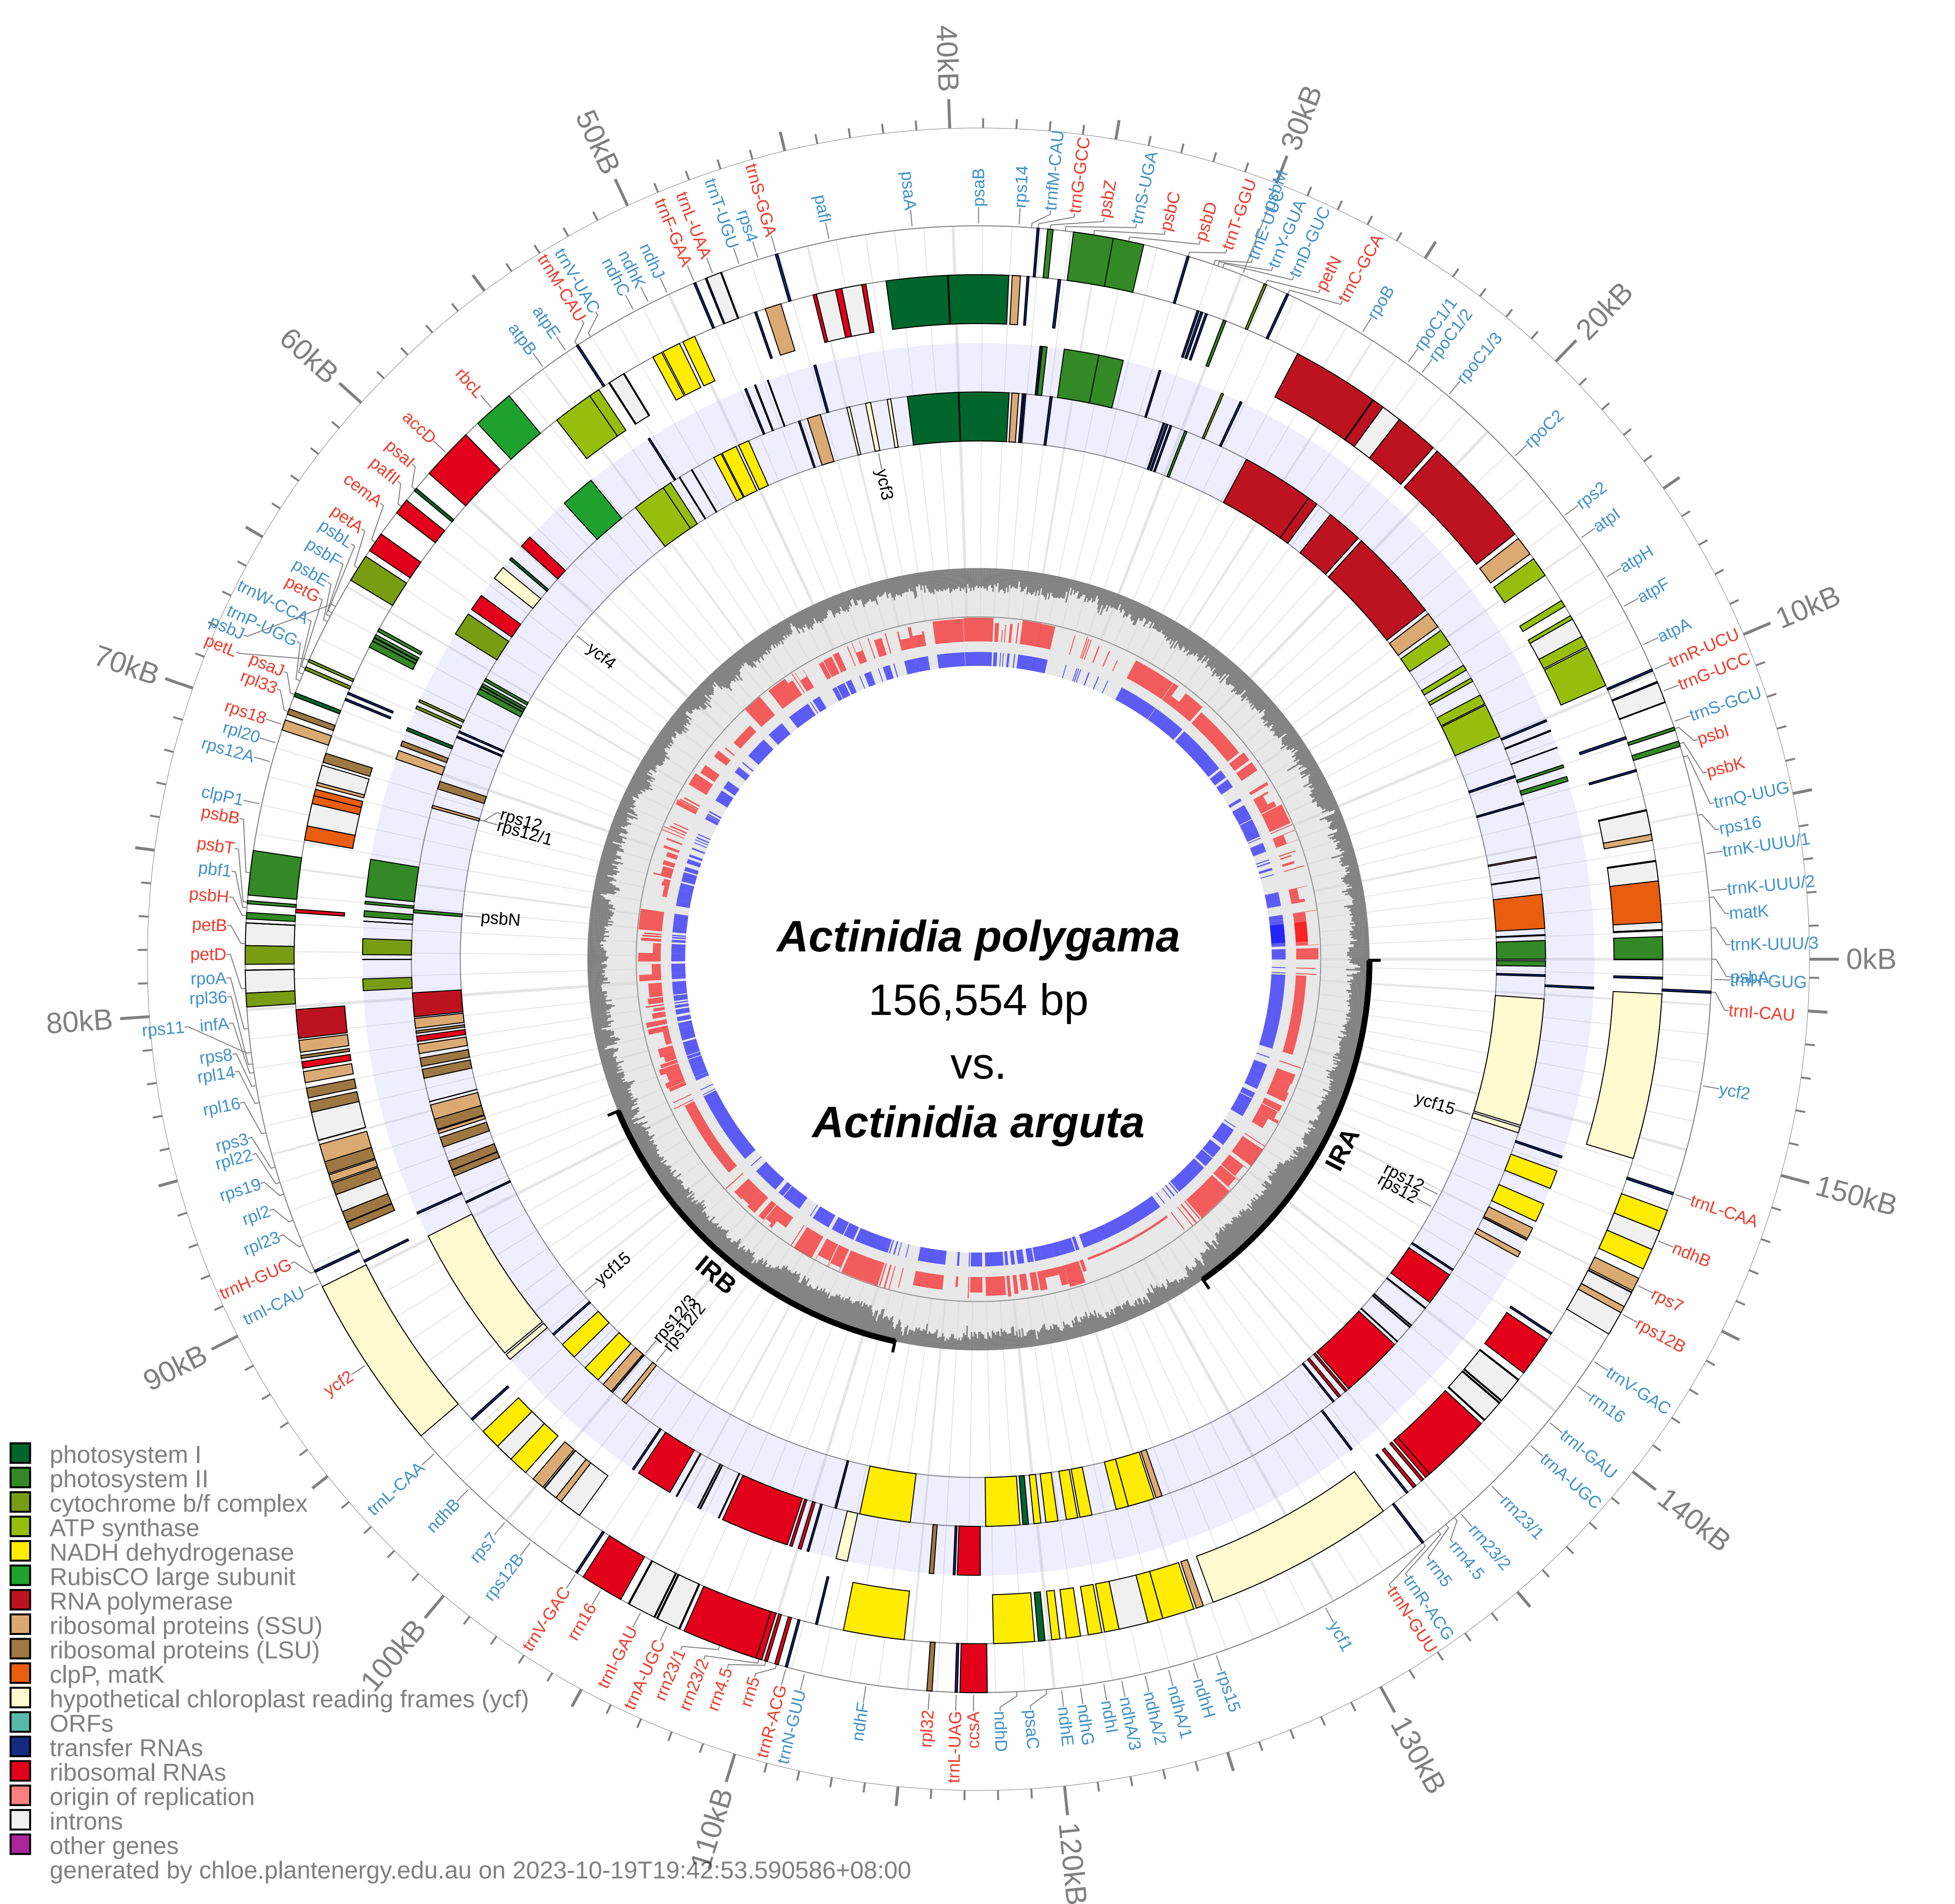

Supplement: s1 [file s1]
